# Supplementary material for: Inland migration of near-surface crevasses in the Amundsen Sea Sector, West Antarctica
Source: Copernicus journal article supplement (doi:10.5194/egusphere-2023-2956), 2024-01-04
Supplement: Supplementary file [file egusphere-2023-2956-AC5-supplement.zip]

# Inland migration of near-surface crevasses in the Amundsen Sea Sector, West Antarctica

Andrew O. Hoffman<sup>1</sup>, Knut Christianson<sup>2</sup>, Ching-Yao Lai<sup>3,4</sup>, Ian Joughin<sup>5</sup>, Nicholas Holschuh<sup>6</sup>, Elizabeth Case<sup>1</sup>, Jonathan Kingslake<sup>1</sup>, and the GHOST science team\*

<sup>1</sup>Lamont-Doherty Earth Observatory, Columbia University, Palisades, NY, USA

<sup>2</sup>Department of Earth and Space Sciences, University of Washington, Seattle, WA, USA

<sup>3</sup>Department of Geosciences, Princeton University, Princeton, NJ 08544, USA

<sup>4</sup>Department of Geophysics, Stanford University, Stanford, CA 94305, USA

<sup>5</sup>Polar Science Center, Applied Physics Laboratory, Seattle, WA 98105, USA

<sup>6</sup>Department of Geology, Amherst College, Amherst, MA 01002, USA

\*GHOST is a part of the International Thwaites Glacier Collaboration. For more information regarding the team, please visit the link which appears at the end of the paper.

**Correspondence:** Andrew Hoffman (aoh2111@columbia.edu)

**Abstract.** Since distributed satellite observations of elevation change and velocity became available in the 1990s, Thwaites, Pine Island, Haynes, Pope, and Kohler Glaciers, located in Antarctica's Amundsen Sea ~~Embayment~~Sector, have thinned and accelerated in response to ocean-induced melting and grounding-line retreat. We develop a crevasse image segmentation algorithm to identify and map surface crevasses on the grounded portions of ~~Thwaites, Pine Island, Haynes, Pope, and Kohler~~ Glaciers~~these glaciers~~ between 2015 and 2022 using Sentinel-1A satellite synthetic aperture radar (SAR) imagery. We also ~~develop~~advance a geometric model for firn tensile strength dependent on porosity and the tensile strength of ice. On Pine Island and Thwaites Glaciers, which have both accelerated since 2015, crevassing has expanded tens of kilometers upstream of the 2015 extent. From the crevasse time series, we find that crevassing is strongly linked to principal surface stresses and consistent with von Mises fracture theory predictions. Our geometric model, analysis of SAR ~~and~~ optical imagery, ~~together~~ withand ice-penetrating radar data ~~and~~ suggest that these crevasses are near-surface features restricted to the firn. The porosity dependence of the near-surface tensile strength of the ice sheet may explain discrepancies between the tensile strength inferred from remotely-sensed surface crevasse observations and tensile strength measured in laboratory experiments, which often focus on ice (rather than firn) fracture. The near-surface nature of these features suggests that the expansion of crevasses inland has a limited direct impact on glacier mechanics.

## 1 Introduction

Crevasses, common to almost all glaciers, are the result of macroscopic material failure due to the progressive accumulation of micro-cracks and voids in glacier ice (Schulson et al., 1989; Vaughan, 1993; Veen, 1999; Colgan et al., 2016). These cracks and inclusions can affect glacier mechanics by promoting iceberg calving (Berg and Bassis, 2022), changing the bulk density and viscosity of glaciers (Meier et al., 1994), and efficiently routing water to the englacial and subglacial hydrology systems

20 (Chudley et al., 2021). Despite the connection to englacial stress and water storage and the implications for ice-sheet mass balance, the physical properties of ice that control the mechanics of fracture remain poorly constrained across the Greenland and Antarctic ice sheets (e.g. Bassis and Walker, 2012; Ultee and Bassis, 2016; Alley et al., 2023). As a result, ice-sheet ice fracture has been suggested as one of the larger sources of uncertainty in projections of future ice-sheet mass loss in the next century (Alley et al., 2023). Despite new observations of ice shelf crevasses and ice-shelf crevasse density change  
25 (Izeboud and Lhermitte, 2023; Surawy-Stepney et al., 2023a, b), no study has yet produced a comprehensive time series of crevasse area change on grounded ice or assessed the potential impact or connection of surface crevasses in these regions on theoretical fracture-based retreat instabilities (i.e. DeConto and Pollard, 2016).

Crevasses typically form near the floating margins of ice sheets where horizontal strain rates are high (Lai et al., 2020). Here, simple empirical relationships between iceberg calving rate and horizontal ice divergence suggest a strong relationship  
30 between tensile strain rates and full-thickness crevasse penetration (Alley et al., 2008). These observations agree with laboratory experiments that measure the strain response of ice under different applied tensile stresses to determine the critical tensile strength, the critical tensile stress beyond which ice fractures.

In laboratory experiments, the tensile strength of ice depends strongly on ice temperature. For temperatures common in Earth's ice sheets, ice fails when effective stresses exceed a threshold between 1 and 3 MPa (Haynes, 1979). Similar experi-  
35 ments conducted on loose snow to understand the failure behavior of avalanche slabs have found that snow crystal lattices fail under significantly less-stress-lower stresses (as low as  $\sim 10$  kPa, McClung, 1978). Tensile strengths inferred from satellite observations of strain rates where crevasses have been manually identified lie between these experimental results on ice and snow, typically between 100 kPa - 200 kPa (Vaughan, 1993). Together, these satellite and laboratory observations suggest a complicated and multivariate relationship between tensile strength and independent variables, such as density, temperature,  
40 and grain size.

Understanding the material strength of ice and its dependencies is important to accurately simulate fracture behavior that may change with the englacial stresses of the ice sheet as terminus conditions evolve under future climate forcing.

When surface meltwater fills surface crevasses, the additional hydrostatic pressure of the water can cause the crevasses to penetrate deeper through a process known as hydrofracture (Nye and Perutz, 1957; Banwell et al., 2013). Over the last  
45 three decades, surface melting has intensified in both Antarctica and Greenland, with longer melt seasons extending further poleward (Cook and Vaughan, 2010). Some models predict that warming will increase meltwater-driven hydrofracture in the ASE-Aumndsen Sea Embayment (ASE) leading to ice-shelf breakup (via the hydrofracture mechanism) and the formation of ice cliffs that collapse when the newly unbuttressed ice cliff exceeds a critical height. Together, these two processes promote rapid grounding line retreat, termed the marine ice-cliff instability (MICI) hypothesis (DeConto and Pollard, 2016). The MICI  
50 hypothesis predicts that, if progressive failure exposes increasingly taller terminus cliffs, that could initiate runaway collapse. Because the ice sheet in the ASE sits on a glacier bed that deepens into the interior, terminal retreat by fracture could promote taller cliffs and runaway retreat (DeConto and Pollard, 2016). Follow-on work has shown that the elastic response of the ice cliff (Clerc et al., 2019) and the effects of melange buttressing (Schlemm et al., 2022) impact the rate of retreat, likely preventing unstable MICI retreat altogether (Needell and Holschuh, 2023). Reduced model experiments (Clerc et al., 2019)



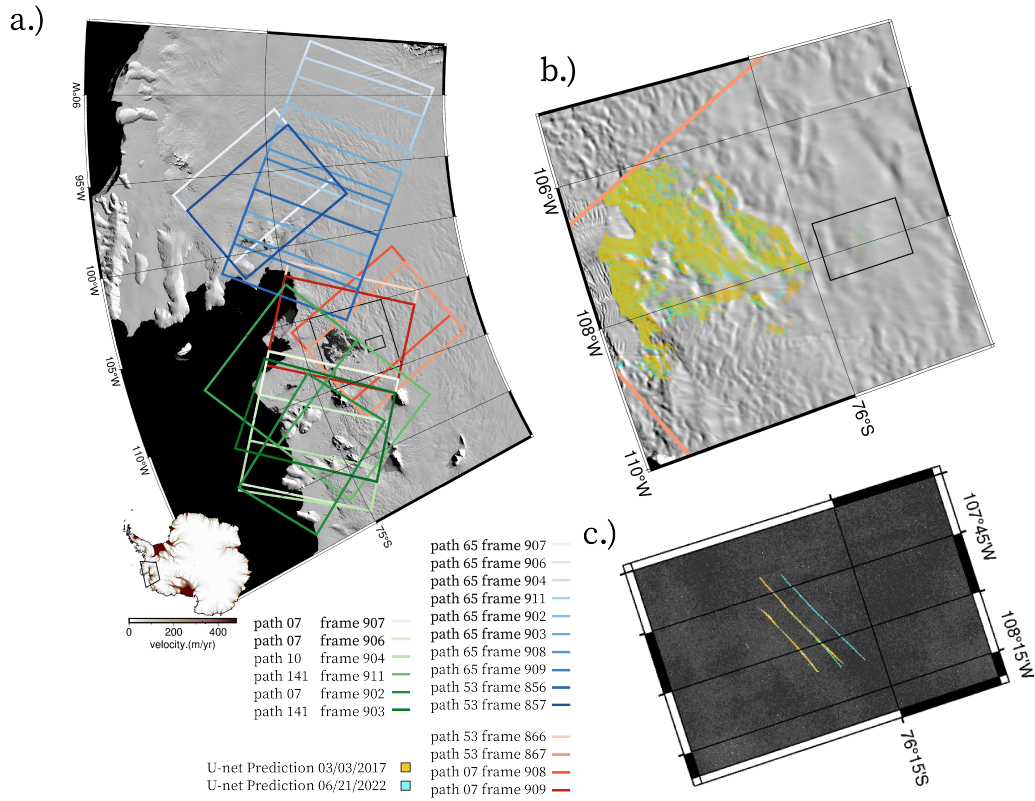

**Figure 1.** (a) Overview of Sentinel-1A scenes of Amundsen Sea glaciers used to create inland crevasse area time series for the grounded regions of Pine Island (lavender), Thwaites (blue, orange), and glaciers feeding the Dotson and Crosson ice shelves (green and red). Black boxes mark areas of paneled images in (b) and (c). (b) An example of the map of crevasses predicted by the U-net from March 2017 (cyan) and June 2022 (orange). Note that the density of crevasses appears to be concentrated on the stoss side of ridges that are captured in the background MODIS image (Haran et al., 2018). The neural network also skillfully detects (c) isolated crevasse features in low-strain environments.

55 and 3D discrete-particle modeling have also shown that the mechanics of the MICI depend critically on the tensile strength of ice (Crawford et al., 2021), estimates of which, as noted above, disagree significantly between satellite observations and laboratory experiments. To date, observed changes in surface crevasse appearance remain disconnected from an assessment of ASE glacier vulnerability and predictions of outlet glacier response.

60 In this paper, we seek to use the presence and extent of crevasse in the ASE, understood through the lens of fracture mechanics, to estimate the material strength of ice in regions where we observe fracture. In the process, we reexamine how to interpret these features, ~~and seek to determine whether~~. Specifically, we use the extent and depth of these features ~~make them~~ to speculate whether they are a useful proxy for ~~the integrity of~~ damaged ice, as has been interpreted in previous studies (i.e. Surawy-Stepney et al., 2023a).

To map crevasse locations and determine rates of crevasse area change, we extend deep-learning neural network frameworks (i.e., [Ronneberger et al., 2015](#); [Akeret et al., 2017](#); [Lai et al., 2020](#); [Surawy-Stepney et al., 2023a, b](#)) (i.e., [Ronneberger et al., 2015](#); [Akeret et al., 2017](#); [Lai et al., 2020](#); [Surawy-Stepney et al., 2023a, b](#)) to satellite synthetic aperture radar (SAR) imagery collected by the Sentinel-1 constellation from 2015–2022. [Our results provide an alternative model framework to other published deep learning approaches \(Surawy-Stepney et al., 2023a, b\).](#) Using Worldview optical imagery and ultra-wideband ultra-high frequency radar data we verify the features we identify with our neural network and construct a time series of crevasse location and area change from 2015–2022 across the ASE. We use this time series of crevasse locations with surface velocity data to test a phenomenological relationship between surface stress and crevasse formation: that crevasses are present when the surface stresses exceed the material tensile strength (Nye, 1959; Vaughan, 1993; Grinsted et al., 2023, and citations therein). We then develop a simple geometric model for the tensile strength of polar firn to aid the interpretation of our observations. Together, our observations and modeling suggest that the presence of surface crevasses in the Amundsen Sea is restricted to the near-surface porous firn layer, which has a tensile strength that is substantially lower than the tensile strength of non-porous ice measured in laboratory experiments. We finish by exploring the implications of near-surface crevassing ~~on~~ [for](#) marine ice-sheet vulnerability and estimates of mass balance in the ASE ~~sector~~.

## 2 Data and Methods: From satellite SAR images to maps of crevasse area change

Our investigation comprises four steps. First, we preprocess SAR images and use manually identified crevasse datasets to train the neural network. We then apply the network to a set of Sentinel-1A images that includes all crevassed areas in the ASE. We then use surface crevasses visible in contemporaneous optical imagery and ice-penetrating radar data to independently verify the segmentation algorithm and constrain the depth of the crevasse features. Finally, we use crevasse locations with satellite observations of surface strain rates to develop a relationship between the effective stress of the ice-sheet surface and the opening of surface crevasses.

### 2.1 Sentinel SAR Imagery Processing and Analysis

#### 2.1.1 Imagery Selection and Processing

Crevasses can be difficult to detect in optical imagery due to snow bridges. Near-surface crevasses covered by snow bridges can, however, be mapped remotely using active microwave synthetic aperture radar (Marsh et al., 2021). Compared to optical imagery, SAR imagery is advantageous because it can provide regular observations through clouds, image features during the polar night, and penetrate through snow and firn ( ~~$\sim 10$  m for C-band SAR in polar firn; Rignot et al., 2001~~) ([~ 10 m for C-band SAR in polar](#)). In this study, we use synthetic aperture radar data collected as part of the European Space Agency’s Sentinel-1 missions.

Sentinel SAR 1A and 1B Level-1 Ground Range Detected, interferometric, wide-swath, high-resolution, amplitude images ( $\sim 5$  m x 20 m native resolution, HH polarization) were selected from 2015 to 2022 using the Alaska Satellite Facility Vertex search tool (ASF DAAC, 2014–2022). Images were chosen geographically to capture areas that contained the approximate inland crevasse extent between 2015 and 2022. We processed imagery for the entire Sentinel subset, but our time-series analysis

95 focuses on 2016 to 2022 due to changes in scene geometry during the satellite commissioning stage and a melt event in 2015 that substantially affected radiometric backscatter amplitude (Ghiz et al., 2021). For geometric consistency, solely Sentinel 1A frames were used (see Figure 1). Sentinel SAR data are available with a repeat time of 12 days; shifts in the acquisition plan can, however, result in less frequent acquisitions for an individual frame. Images with HH polarization were selected because they appear to have the advantage of higher backscatter amplitude than VV polarization, which reduces random noise in preprocessed images (Marsh et al., 2021). Images in both ascending and descending orbits were used to assess possible differences in detectability based on satellite image look angle and crevasse orientation.

Image processing was conducted using the European Space Agency (ESA) Sentinel Application Platform (SNAP) Toolbox (SNAP, 2022). First, orbit state vectors in the gridded product metadata were updated using precise orbit files supplied by the ESA Global Navigation Satellite System Hub. Several radiometric processing steps were then applied, including removal of antenna thermal noise, border noise removal which masks null pixels introduced in the creation of the ground range detected products, speckle filtering, and radiometric calibration to backscatter coefficient using Look Up Tables that apply a range-dependent gain including an absolute calibration constant. We applied an ellipsoid correction geolocation-grid operator to convert each image to an orthorectified polar stereographic projection (EPSG:3031) using Sentinel ground-control tie points. Orthorectified images were then resampled to 25 m resolution using a nearest-neighbor interpolation to preserve sharp features. Following radiometric calibration and orthorectification, backscatter coefficients (0 to 1) were converted to unsigned 8-bit integers (0 to 255) and exported as GeoTIFF files (Supplementary Fig. S1).

### 2.1.2 Neural Network architecture

Pre-processed Sentinel images were then used to train a U-net image segmentation algorithm (Ronneberger et al., 2015; Akeret et al., 2017; Lai et al., 2020, Supplementary Fig. S2). The U-net architecture extends the conventional Convolutional Neural Network (CNN) framework by adding expansive operations (upsampling layers) to the contracting operations (downsampling layers) to identify and localize features in an image. The downsampling path followed by the upsampling path resembles a U-shape and gives the network its name.

### 2.1.3 Neural Network Training

Training data consists of pairs of images and binary classifications for crevassed and crevasse-free regions. Training data were generated using image masking software written for this purpose as part of this study. The masks were generated by first using a backscatter reflection coefficient threshold to define an initial binary classification – brighter reflections are often associated with crevasses. This binary classification was then refined by manually selecting crevasses that were too dim to be identified by the threshold and deselecting false-positive features. The image training dataset includes images from only grounded ice areas of ASE glaciers because we found basal crevasses can complicate feature segmentation over ice shelves. These training scenes span the entire time series to capture seasonal and interannual changes in the surface reflectivity potentially induced by melting and snow metamorphism. The training dataset was augmented by rotating and flipping each image and ground truth mask to produce over one thousand training images from binary classifications of 144 images.

We train the network using these refined binary classification images of crevasses. We implement the U-net segmentation algorithm using the Python package Tensorflow (Abadi et al., 2015) with training data from Thwaites, Pine Island, Haynes, Pope, and Kohler Glaciers. The size of raw Sentinel 1A images ( $\sim 17000 \times 25000$  pixels;  $> 500$  MB) is too large to segment at the native image resolution. We, therefore, divide each image into  $500 \times 500$  pixel patches and run the U-net algorithm on each patch individually using a sliding window with an offset equal to the output layer image (460 pixels in both dimensions). We tested a variety of optimizers and found the ~~Adams~~-Adam optimizer maximized the area under the curve (AUC) of the receiver operating characteristic (ROC) that we used as the evaluation metric for model selection. The AUC metric measures the ability of a binary classifier to distinguish between classes and is used as a summary statistic of the ROC curve. The output of the U-net model is a  $460 \times 460$  pixel image of the likelihood (ranging from 0 to 1) that a pixel contains part of a fracture. We then used the  $F_1$  score, which assesses the predictive skill of a model by elaborating on its class-wise performance to choose a threshold for binary classification (model prediction probability greater than 0.8 maximized the  $F_1$  score). Given the resampled image resolution is 25 m x 25 m, this method can only capture features that are greater than or equal to 1 pixel in size.

#### 140 2.1.4 Neural Network Application

We apply the trained network on more than three hundred Sentinel-1A SAR images from 20 scenes (Fig. 1a) that were selected for their comprehensive spatial and temporal coverage of lower Thwaites Glacier, Pine Island Glacier, and Haynes, Smith, Pope, and Kohler Glaciers that feed the Dotson and Crosson Ice Shelves. Each scene is divided into  $500 \times 500$  pixel patches using the same division scheme implemented for the training data. These images were then combined by merging the images, using the maximum value of the pixels within the shared windows. Because translational equivariance is not preserved in CNNs, clipping schemes are necessary to accurately stitch patches of the segmented image back together. We evaluate a variety of padding schemes and find that padding each segmented layer by 20 pixels reduces the error most in the final image relative to hand-drawn masks.

In agreement with the findings of Marsh et al. (2021), crevasses manifest differently in Sentinel imagery as a function of satellite look angle, the slope of the surface, and crevasse orientation relative to the satellite track (Fig. 3). In descending scenes over Thwaites and Pine Island Glaciers, the left column in Figure 3, crevasses that fracture along the grid north-south axis appear highly reflective; while in the ascending scenes, (the middle column of Figure 3), crevasses that are oriented in the grid east-west direction return the most energy. Segmented crevasse features from single scenes are still meaningful when compared to scenes from the same path and frame, but analysis of a single frame may systematically miss features that are not visible because of the crevasse orientation relative to the sensor look angle. This complicates efforts to compare the segmented crevasses with surface strain rates. To mitigate bias introduced by the effects of satellite look-angle, we combine ascending and descending scenes shot within 30 days of one another and create merged predictions that capture multiple look angles. Image merging was done using the maximum of the union of predictions from individual paths and frames.

### 2.1.5 Validating the network and image filtering

160 The network was applied to the complete time series and used to calculate the area of the crevassed ice-sheet surface using a 3-month rolling median filter and a threshold of  $10 \text{ km}^2$  to define outliers to be excluded from the time series. These outliers typically overestimated crevasse-area, likely due to surface melting or surface temperature anomalies that temporarily increase the surface backscatter (Joughin et al., 2016). Because C-band SAR imagery penetrates up to several ~~dozen~~ meters into the subsurface (Rignot et al., 2001), it is difficult to determine whether the crevasse void starts at or below the surface from SAR  
165 imagery alone.

To better determine the connection of the features we identify in SAR imagery to the surface appearance and subsurface geometry of crevasses, we use complementary high-resolution optical imagery (WorldView) and ice-penetrating radar data collected as part of Operation IceBridge (OIB) and the International Thwaites Glacier Collaboration (ITGC) aerogeophysical surveys, (Fig. 4). WorldView high-resolution optical imagery does not penetrate into the subsurface and thus presents an  
170 unambiguous image of the crevasse surface geometry. The geometry of crevasses in the subsurface was interpreted using ice-penetrating radar data (i.e. Nath and Vaughan, 2003; Williams et al., 2014). Interpretations of crevasse geometry in ice-penetrating radar data are complicated by the dependence of the return on the orientation of the radar profile relative to the geometry of the crevasse and the generally complex shape of the crevasse itself. The ultra-high-frequency ultra-wideband (600-900 MHz) radar system flown as part of OIB and ITGC surveys is able to image englacial structures through a kilometer of ice  
175 with a vertical (Rayleigh) resolution that captures changes in conductivity due to density contrasts in the near-surface on the scale of less than a meter. The four-element antennas transmit a 400 W pulse into the surface that is then recorded using a 12-bit analog-to-digital converter (Karidi, 2018). The trace spacing for this instrument is large (~~pulse repetition frequency of 50kHz traveling on a platform moving 80 meters per second~~) compared to the trace spacing of ground-based impulse radar surveys that have historically been used to map subsurface crevasses, but ~~the instrument is still capable of mapping the subsurface at 5~~  
180 ~~m horizontal resolution~~ a trace posting of 2.7m should be sufficient to map crevasses.

### 2.2 Stress analysis from velocity data

Crevasse occurrence can be related to surface velocity and strain rates using the constitutive ~~relation for ice~~ relations for snow and ice, and assuming that crevasses form if surface stresses exceed a failure criterion. The most common formulation for fracture nucleation and tensile failure is the von Mises (octahedral) failure criterion. This criterion assumes that the material  
185 can only support an octahedral shear stress that is less than the tensile strength of ice ( $\sigma_t$ ) and can be formulated as (Vaughan, 1993):

$$\sigma_e < \sigma_t \quad (1)$$

$$\sigma_e^2 = \sigma_{1surf}^2 + \sigma_{2surf}^2 - \sigma_{1surf}\sigma_{2surf} \quad (2)$$

where  $\sigma_e$  can be interpreted as the effective stress and  $\sigma_{1surf}$  and  $\sigma_{2surf}$  are the principal surface stresses parallel to the ice surface. Because the top boundary of an ice sheet or glacier is a free surface, normal stress and traction are zero at this boundary, and thus one of the three principal stresses must be normal to the surface and have a magnitude equal to zero (Vaughan, 1993; Veen, 1999). The other two principal stresses are parallel to the surface. We combine our new crevasse location time series with satellite SAR observations of ice velocity from the same satellite constellation (Sentinel 1A and 1B) to compare crevasse locations with those consistent with the von Mises failure criterion.

Following previous work (Nye, 1959; Bindshadler et al., 1996; Veen, 1999; Alley et al., 2018), we first calculate the principal surface stresses from the ice-velocity time series (see Supplement S2). We then extracted the surface stresses at crevasse locations identified by the CNN from quarterly velocity measurements between 2015 and 2022. Then, following Vaughan (1993), we used quarterly principal surface stresses at the location of crevasses to construct failure envelopes and estimate the tensile strength associated with crevasse formation (see Supplement S2).

### 2.3 A simple geometric model for the fracture properties of firn

Physical models that unify the observations and behavior of near-surface fracture with fracture propagation deeper in the ice column are important to accurately represent the effects of damage on the effective viscosity of the ice sheet from the assimilation of the growing observations of crevasse position and crevasse area change (Surawy-Stepney et al., 2023a, b). Models that describe the effects of porosity on fracture toughness and tensile strength were first developed for metals, ceramics, polymer foams, and sponges (Ashby and Medalist, 1983; Maiti et al., 1984; Gibson and Ashby, 1999). Though the fracture toughness of freshwater ice decreases with increasing porosity (Rist et al., 1999, 2002), this relationship remains disconnected from simulated ice-sheet mechanics, which do not typically represent firn processes. Here, we ~~develop~~ advance a simple geometric model for the tensile strength of firn to better understand the apparent disagreement between controlled laboratory experiments of ice fracture and remote sensing observations of near-surface crevasse location and strain used to derive tensile strengths from satellite observations.

~~Our approach uses geometric arguments based on~~ Here we build on the work of (i.e. Jelitto and Schneider, 2018), who establish a geometric framework for modeling fracture properties in ceramics and metals. We use the same geometric arguments to advance a simple conceptual model for firn pore space ~~to~~ and develop a description for the tensile strength of densifying firn ( $\sigma_f$ ) from the tensile strength of ice ( $\sigma_I$ ) and firn porosity ( $P$ ). We start by assuming a closed idealized lattice of firn with wall thickness ( $t$ ) and unit cell width ( $w$ ), illustrated in Figure 2. Within this lattice, we can define the dimensionless ratio of pore space to wall thickness  $d = t/w$  where  $0 < d < 1$ . The porosity can be related to the volumetric fraction of the firn lattice divided by the volume of the characteristic unit cell, ( $w^3$ ), and described in terms of the dimensionless ratio of pore space as

$$P = \frac{(w-t)^3}{w^3} = (1-d)^3. \quad (3)$$

~~We~~ As in (i.e. Jelitto and Schneider, 2018), we assume the tensile strength of the lattice is reduced by a factor that is proportional to the reduced crack-face surface area (Fig. 2b) relative to a completely closed lattice (i.e. a lattice representing pure ice).

The crack face is a two-dimensional feature of the lattice that represents the face bisecting the lattice volume that maximizes the area of void space. From the geometry illustrated in Figure 2, the tensile strength of firm as a function of the dimensionless ratio of pore space can be described by

$$\frac{\sigma_f}{\sigma_I} = \frac{w^2 - (w - t)^2}{w^2} = 1 - (1 - d)^2. \quad (4)$$

225 The idealized relationship between the dimensionless pore space fraction and tensile strength holds in the absence of pore connections where the density of the firm is very near the density of ice at the depths exceeding the bubble close-off depth, where firm air trapped in pores can no longer exchange with surrounding voids. To account for pore space connections within the lattice at lower densities where grains have not yet sintered, we define the relative fraction of pore connections, ( $X$ ), which we also assume is proportional to the reduced strength across the crack-face:

230  $\frac{\sigma_f}{\sigma_I} = X(1 - (1 - d)^2).$  (5)

Solving for the dimensionless ratio of the pore space as a function of porosity from Equation 3, we find:

$$d = 1 - P^{1/3}, \quad (6)$$

and thus,

$$\frac{\sigma_f}{\sigma_I} = X(1 - (1 - d)^2) = X(1 - P^{2/3}) \quad (7)$$

235 Finally, we must determine the relationship between the relative fraction of pore space connections and firm porosity, i.e.  $X = f(P)$ . ~~Following studies that have used similar geometric arguments to model fracture properties in ceramics and metals (i.e. Jelitto and Schneider, 2018), we~~ We assume that the disconnections can be related to porosity by  $X = (1 - P)^n$ , and the tensile strength can be formulated from the geometry of the crack face as

$$\frac{\sigma_f}{\sigma_I} = (1 - P)^n (1 - P^{2/3}). \quad (8)$$

### 240 3 Results

Our presentation of results begins by examining individual crevasses and confirming their presence in independent optical imagery and radar datasets, we then discuss changes in crevasse patterns across the ASE in the context of other glaciological and oceanographic changes observed over the last 10 years, and the relationship between porosity and tensile strength of firm.



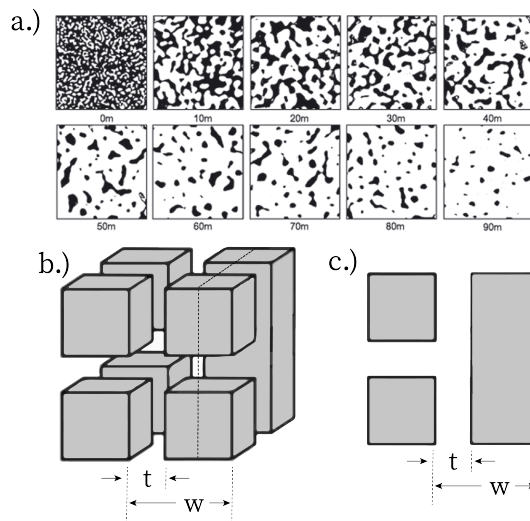

**Figure 2.** Micro CT scan of firn structure revealing the effect of compressed pore space (black) within the firn unit cell (a) shown with the conceptual geometric model of the firn (b) and the crack face used to derive the relationship between tensile strength and porosity (c). The scan was first presented by Lomonaco et al. (2011) using firn cores collected from Summit, Greenland.

### 3.1 Verifying Crevasse Feature Extent and Constraining Vertical Depth with Optical and Ice-Penetrating Radar

#### Imagery

A comparison of crevasse detections from the SAR data with high-resolution optical imagery and ice-penetrating radar data strongly supports our interpretation that the detected features are crevasses. These datasets ~~interpreted~~interpreted together also reveal that crevasses detected with SAR data are commonly buried so that there is little or no surface expression in optical imagery. Optical imagery and ground penetrating imagery also reveal that the pixel resolution of crevassing in SAR imagery resampled to 25m<sup>2</sup> is not directly related to the size of the detected crevasses. Since the radar imagery is sensitive to reflections off crevasse sidewalls, a pixel may be very bright if it images a reflection from a sidewall in a favorable geometry even though the crevasse itself is much smaller than the area represented by the pixel (Marsh et al., 2021). Narrow-width crevasses with sidewalls orthogonal to the incident radar wave may appear as bright reflections even if the crevasse width is small. Using the data presented here, we cannot clearly relate the crevasses in SAR imagery directly to their true geometric size, and therefore restrict interpretations of crevasse appearance to changes in crevassed area in the same Sentinel-1A image scene.

#### 3.1.1 Crevasse Appearance in Optical Imagery

Near the inland onset of crevassing (Fig. 4b), WorldView imagery often directly captures clear crevasses or surface features indicative of crevassing (Fig. 4b), such as regular "swells" likely associated with snow bridges (Supplementary Fig. S3, S4). These features are consistent with features that are also imaged in SAR imagery and ice-penetrating radar data (see Section 3.1.2). In some areas downstream of crevasse onsets, there is extensive crevassing indicated in SAR imagery, but there is no

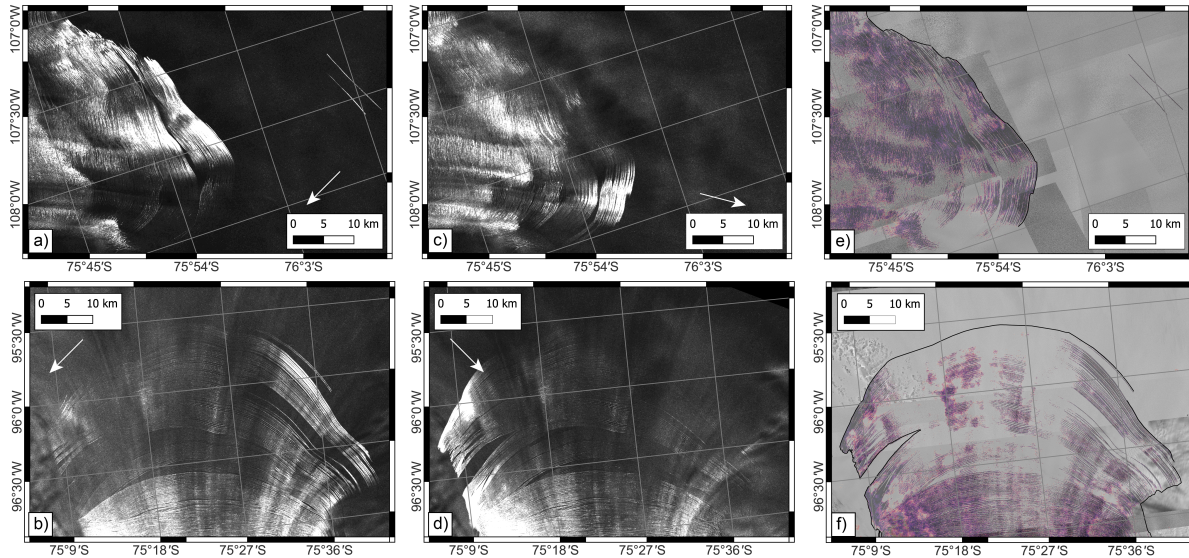

**Figure 3.** Crevasse appearance in ascending (a, b) and descending (c,d) orbits of Sentinel-1A satellite imagery for interior regions of Thwaites and Pine Island Glaciers. Arrows indicate satellite look direction. Also shown is a mosaic of WorldView images (e,f) for the same coverage of Thwaites Glacier and Pine Island Glacier, revealing that many of the crevasses that are readily visible in Sentinel imagery are buried beneath snow bridges that obscure the features in panchromatic optical imagery.

surface expression or ambiguous expression of the crevasses in contemporaneous, co-located WorldView images (i.e. Fig. 4b, Supplementary Fig. S5c). This suggests that these crevasses are subsurface features – crevasses that have either been buried by accumulation following formation or initially formed below the surface. Examination of spatially coincident ice-penetrating radar profiles confirms that these are subsurface features (Fig. 4e, see Section 3.1.2). This indicates that SAR imagery reveals  
265 subsurface crevasses reliably, including occasional near-surface crevasses (< 10 m depth).

### 3.1.2 Crevasse Appearance in Ice-Penetrating Radar

There are several commonly observed features recorded in the ultra-wideband ultra-high frequency ice-penetrating radar data that have conventionally been associated with crevasses (Nath and Vaughan, 2003; Williams et al., 2014). Where there is a clear firn/void-space contrast, we see bright reflections from the top of buried crevasses in ice-penetrating radar data (Fig.  
270 5). These reflections appear as hyperbolic scatterers, due to apparent diffraction where the snow bridges re-connect with the continuous firn. When the transmitter is above the crevasse, transmitted wave energy appears to be critically refracted along the crevasse wall so that little energy is reflected back to the receiver. This results in an apparent low amplitude "shadow" beneath the crevasse void space in the radargram. In the case of basal crevasses observed over the floating ice shelf, there are reflections from the top of the crevasse, where there is an ice/seawater interface. Schematics of the radar wave ray paths and examples

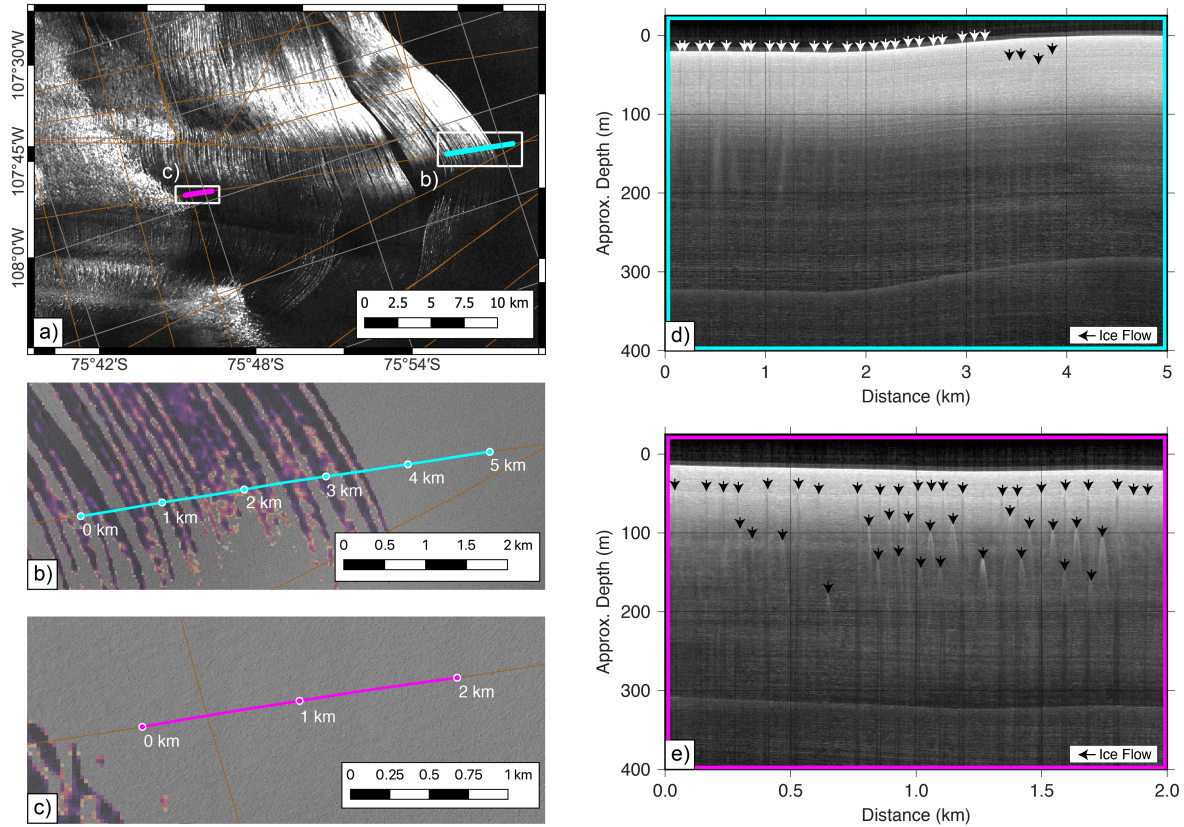

**Figure 4.** (a) SAR backscatter intensity image with flight lines of ice-penetrating radar that cross the (b) onset of surface crevassing detected in U-net (red) with panchromatic optical imagery and (c) buried U-net detected crevasses (red) downstream shown with panchromatic optical imagery. Buried crevasses are visible in near-surface radar profiles (d and e). Subpanels (d) and (e) correspond to radar profiles along flight lines shown in (b) and (c), respectively. White arrows indicate crevasses that are expressed at the surface while black arrows indicate subsurface crevasses with hyperbolic diffractors. The vertical position of the black arrows indicates the depth that crevasses first appear in radar data relative to the surface. The strong reflection at  $\sim 300$  m is the surface multiple.

275 of the resulting radargrams that illustrate these characteristic descriptions are shown in Figure 4, Figure 5, and Supplementary Fig. S5-S7.

The agreement between crevasses identified in SAR imagery and crevasses visible in the ice-penetrating radar and high-resolution visible imagery gives high confidence that the near-surface crevasses we detect in SAR imagery are robustly identified by the neural network. Observations of the three-dimensional structure revealed in the SAR and ice-penetrating radar data have ramifications for the interpretation of ice tensile strength and the influence of crevassing on ice-sheet structure, which is discussed later in Sections 3.3 and 2.3. We next evaluate changes in the crevasse area recorded in the SAR imagery time series and their implications for understanding the material properties and fracture mechanics of firn/ice.

280

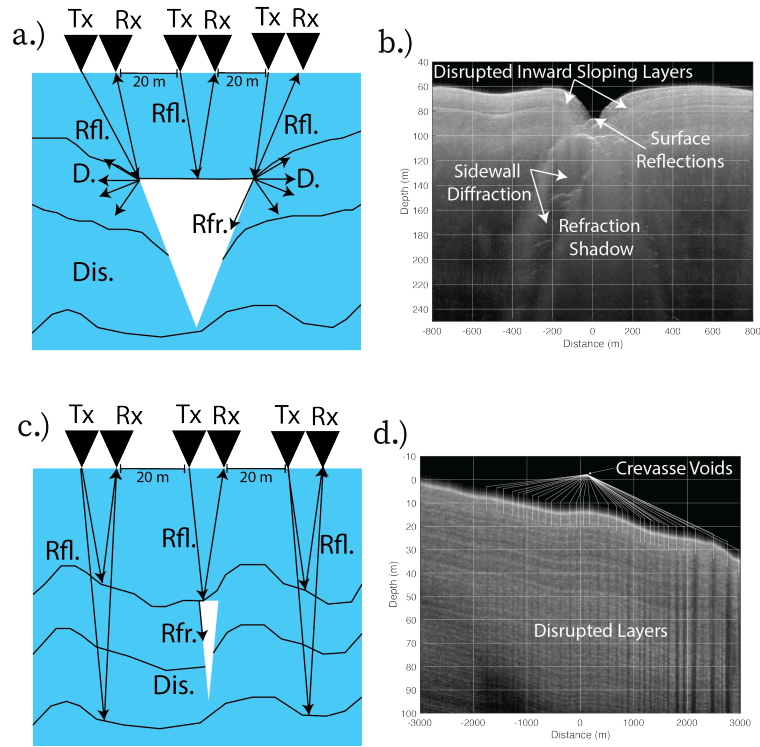

**Figure 5.** ~~transmit~~ Transmit and receive paths for different crevasse geometries. The transmitter (Tx) and receiver (Rx) are shown with illustrations of the transmit wave path. Features ~~in~~ shown in radargrams are labeled on the wave paths: hyperbolic reflections from the crevasse top (Rfl.), refraction along the crevasse wall (Rfr.), hyperbolic sidewall diffraction (D), and discontinuous subglacial layering (Dis). Also shown are (a-b) the reflections we attribute to narrow crevasses we observe in the interior near-surface and (c-d) larger near-surface crevasses that have opened on the ice shelf.

### 3.2 Crevasse Expansion in the Amundsen Sea Embayment

Results from the algorithm applied to the SAR image time series are summarized in Figures 6 and 7. We identify three  
285 qualitative changes in crevasse area and spatial density that together result in an overall increase in the damaged surface area of the Amundsen Sea Embayment:

- ~~Crevasse initiation in previously uncrevassed ice that is farther inland than any previously observed crevasse.~~
- The advection of crevasses from upstream into undamaged areas downstream ~~–~~ (Fig. 6: orange arrow in image from [2019-06-09](#)).
- New crevasse appearances that overprint preexisting fractures that have been advected from upstream. These changes are discernible in the spatial density of crevasses and the patterns of crevasse orientations ~~–~~ (Fig. 6: purple arrow in image from [2019-06-09](#)).

290



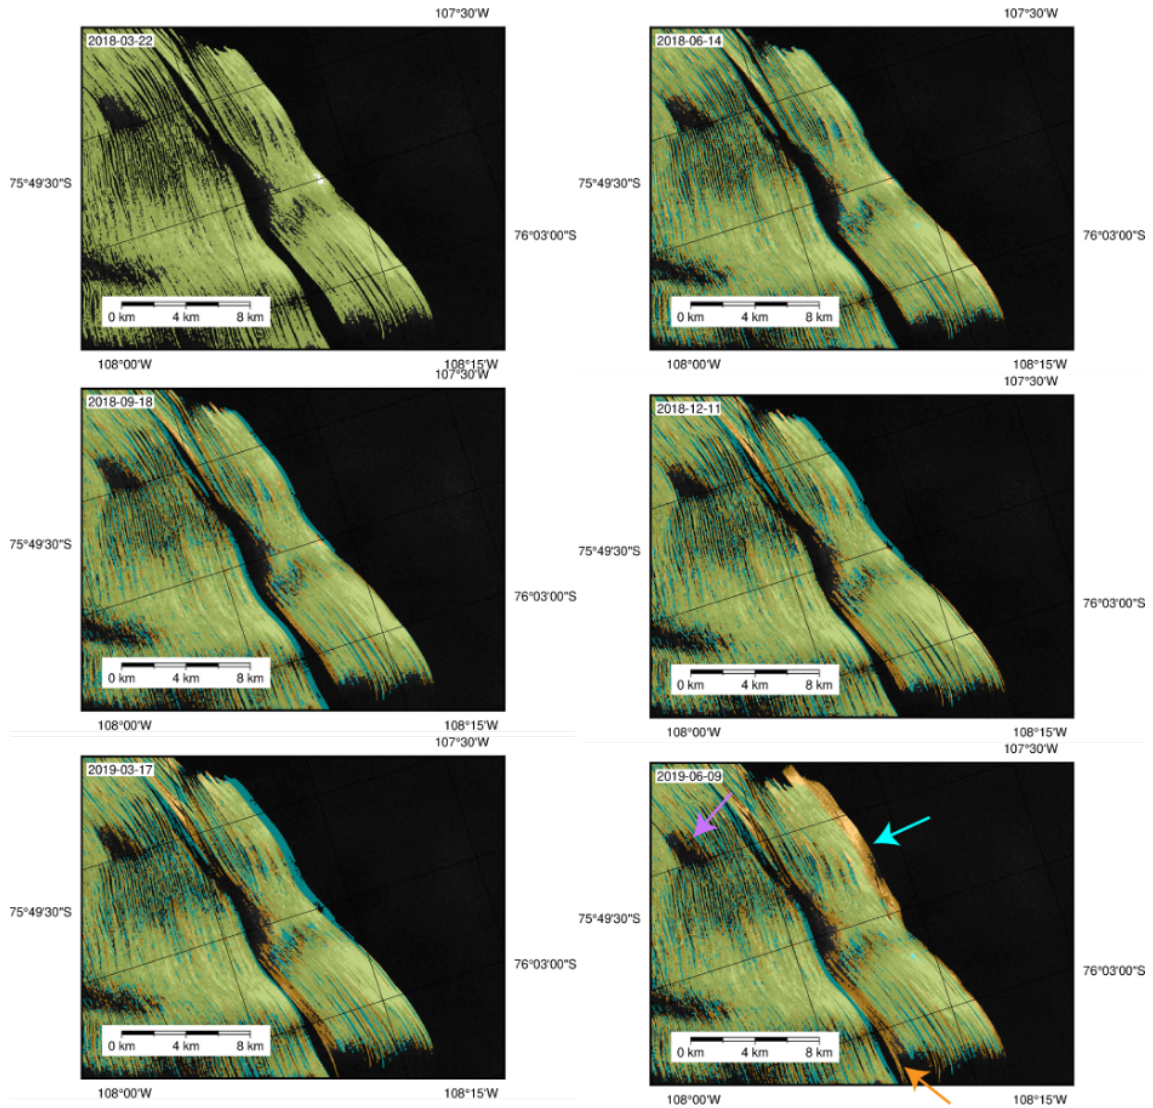

**Figure 6.** SAR time series of inland crevasse advection and nucleation between 2018-2019 in the upper reaches of the crevassed trunk of Thwaites Glacier. The U-net crevasse position of a scene shot in March 2018 (cyan) overlain with subsequent crevasse positions (orange). The crevasse position images are transparent so that where the locations overlap the image appears green. Arrows highlight different mechanisms of crevasse area change: blue, crevasse initiation in previously uncrevassed areas; orange, advection into previously uncrevassed areas; and purple, new crevassing in areas with preexisting fractures.

- Crevasse initiation in previously uncrevassed areas farther inland than any previously observed crevasse (Fig. 6; blue arrow in image from 2019-06-09).

295 The broad-scale crevassing patterns differ between the major glacier systems we examine in this study and are correlated with changes in ice velocity and effective stress expressed in the glacier surface velocities (Fig. 7, [Fig. S9](#)). From 2017–2022, Pine Island Glacier sped up, accelerating from the grounding zone ( $\sim 500$  m/yr) to the deep interior. As the glacier accelerated, likely due to changes in the buttressing capacity of the ice shelf due to a large iceberg calving event in 2017, the crevassed area increased (Fig. 7b; Joughin et al., 2021). The crevassed area then increased more slowly from 2018 to 2020 remaining almost  
 300 constant. This stagnation in the crevassed area was followed by a second rapid increase in crevassed area from 2020–2021, which is contemporaneous with another major calving event. Thwaites Glacier also accelerated between 2017–2022, speeding up by 400 m/yr near the grounding zone (Benn et al., 2022). This speedup has been attributed to the development of full-depth fractures near a prominent pinning point on the Thwaites Eastern Ice Shelf (Benn et al., 2022), and also coincides with enhanced sub-ice-shelf melting in the ASE (Davis et al., 2023). During this time period, the crevassed area of Thwaites Glacier increased  
 305 by 10% and expanded inland of the glacier grounding line; crevassed area density also increased in previously crevassed regions. The glaciers that feed Dotson and Crosson Ice Shelves did not systematically speed up during this time period and crevasse areas here remained steady except for a ~~subtle~~ [subtle](#) increase in crevassed area in 2017. These observations indicate that the expansion of crevasses is likely due to increases in surface stresses associated with higher surface strain rates.

### 3.3 Failure envelopes and a data-driven tensile strength model of near-surface fractures

310 Following Vaughan (1993), maps of surface stress and fracture location were used to create ~~ovaloid~~-failure surfaces (principal surface stress plots) for each quarterly velocity product. These failure envelopes do not change substantially over time (Fig. 7a). This ~~ovaloid~~-[elliptic](#) relationship between principal surface stresses and brittle failure matches the predictions of the von Mises failure criterion (Vaughan, 1993). Comparing surface stress values between crevassed and uncrevassed ice suggests that the tensile strength of the near-surface is bounded [from below](#) (Fig. 8). For Thwaites Glacier (other glaciers in the ASE  
 315 have similar results); ~~see supplement figure S8, this approach constrains a failure envelope consistent with a tensile strength between 75 and 210 kPa~~ [S9](#), [90% of crevassed pixels occur for critical von Mises stresses greater than 82 kPa or greater, 80% of crevassed pixels are for equivalent stress criteria of 82 to 165 kPa \(10% of crevassed pixels for von Mises stresses greater than 165 kPa\)](#). The apparent upper limit of the von Mises stress in stress envelopes (Fig. 7, 8) and histograms of von Mises stress (Fig. 9, [S8](#)) [reflects the class imbalance of high-stress pixels](#). These estimates of the tensile strength of the ice  
 320 sheet near surface agree with limits cited elsewhere in the remote-sensing literature but disagree with failure limits determined from laboratory measurements conducted on pure ice ( $\sim 1800$  kPa; Haynes, 1979).

### 3.4 Geometric Model

Our geometric model for the tensile strength of firn suggests that porous snow is much easier to fracture than ice. Figure 10 shows a comparison of the tensile strength model fit with tensile strengths determined from snow experiments and experiments  
 325 on ice conducted over a range of ice temperatures and grain sizes (McClung, 1978; Haynes, 1979). ~~The~~ [While this is only one possible functional relationship between porosity and strength, the](#) model shows encouraging agreement with lab experiments

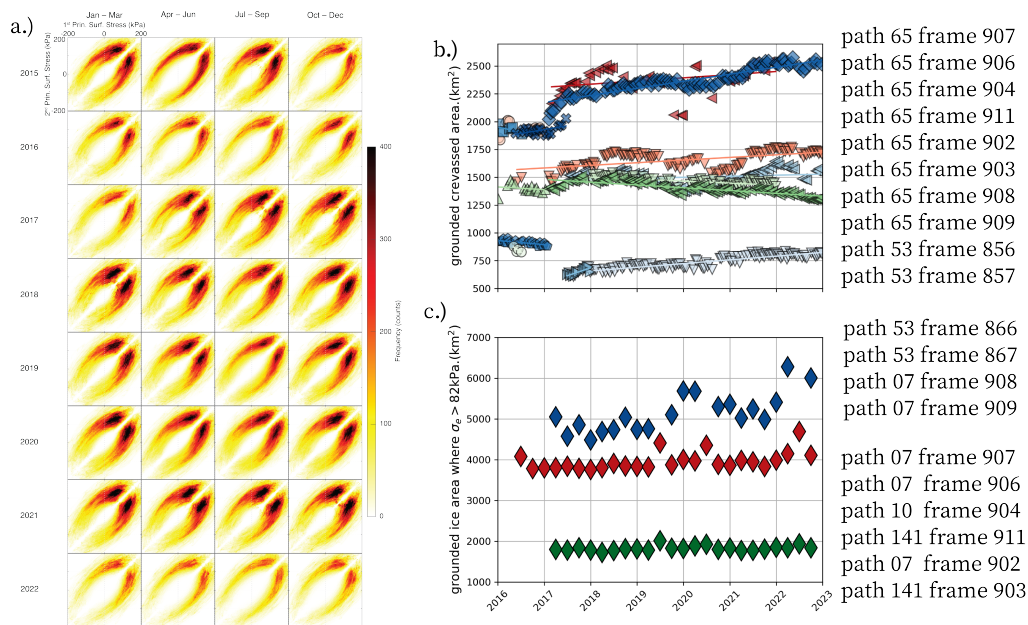

**Figure 7.** (a) Principal surface stress failure envelopes of Thwaites Glacier crevasse time series from 2015–2022, following Vaughan (1993). (b) Crevasse area for the grounded regions of Pine Island (blues), Thwaites (reds), and the glaciers feeding Dotson and Crosson Ice Shelves (greens), with (c) the area where the effective stress (calculated using the surface membrane stresses) exceeds 200 kPa.

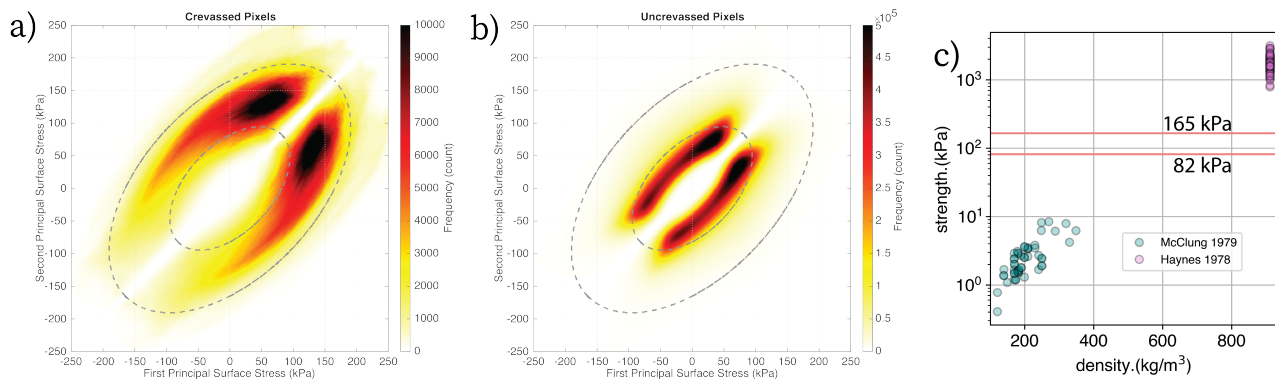

**Figure 8.** Principal surface stress failure envelopes observed on Thwaites Glacier are shown for (a) crevassed and (b) uncrevassed regions of the glacier identified with U-net. These envelopes-ellipses bound the tensile strength of the surface (dotted lines). Also shown are the (c) experimental tensile strengths inferred from laboratory experiments conducted on snow and ice. The tensile strengths inferred from the surface observations in this study (dotted lines in panels a and b) are also shown (red lines).



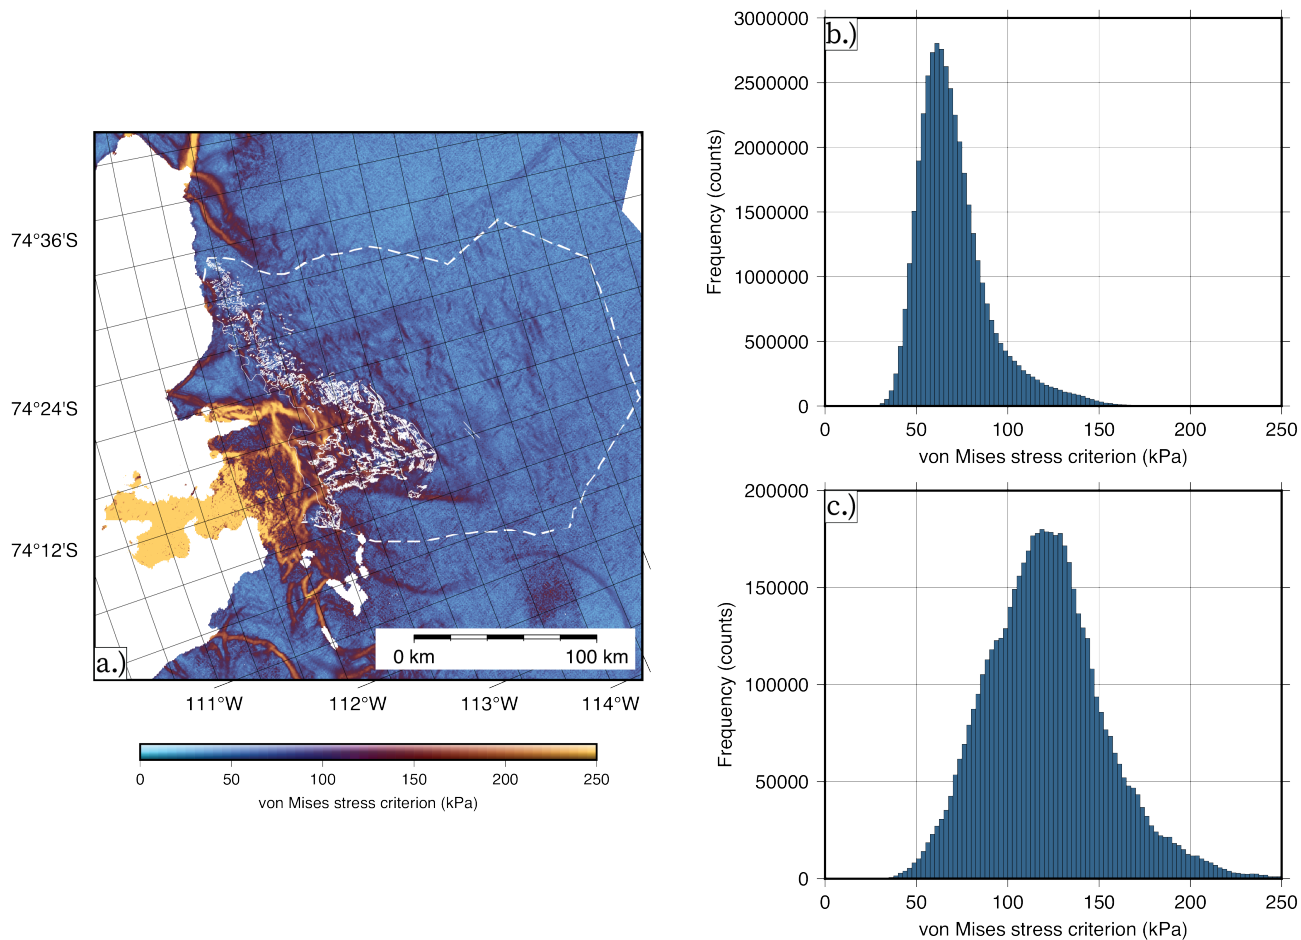

**Figure 9.** (a) Von Mises Stresses shown with crevasses area (threshold outlined where crevasse probability exceeds .8) for Thwaites Glacier. Also shown are (b) the histograms of von Mises stresses for uncrevassed regions and (c) crevassed areas for the area outlined in the hashed white line.

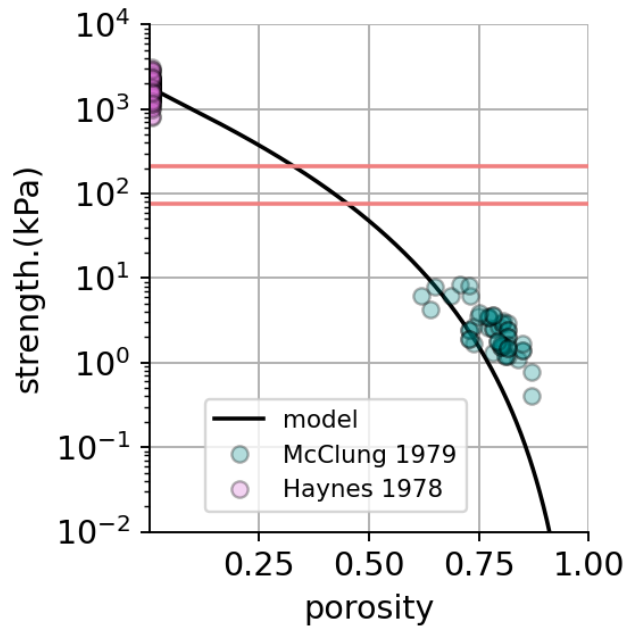

**Figure 10.** Model fit for tensile strength of ice and firn as a function of porosity. Data used to fit the model are shown from studies on ice (Haynes, 1979) and porous snow (McClung, 1978). The best-fit model would suggest an exponent,  $n = 3.6$ , and tensile strength,  $\sigma_I = 1800\text{kPa}$ . The range of tensile strengths measured in laboratory experiments for solid ice (i.e. Haynes, 1979) demonstrate the dependence of fracture on temperature and physical properties of crystal grains.

and suggests that the near-surface fractures we observe in the Amundsen Sea are consistent with the fracture mechanics of polar firn.

## 4 Discussion

### 330 4.1 Drivers of Inland Crevasse Expansion

Inland migration of crevasses appears to be linked to ongoing inland-acceleration and inland effective stress changes in response to mass loss near the grounding zone. Pine Island, Thwaites, and the neighboring Haynes, Pope, and Kohler Glaciers in the ASE are losing mass at a greater rate than any other glaciated region in Antarctica (Shepherd et al., 2019; Rignot et al., 2019). Currently, submarine melt appears to pace mass loss and ASE glacier retreat (Jacobs et al., 1996; Jenkins et al., 2010, 2018),  
 335 but changes in the buttressing capacity of ASE glacier ice shelves due to calving have also been linked to ephemeral inland acceleration (Joughin et al., 2021), and loss of ice-shelf buttressing has been hypothesized to be a major driver of retreat in a future warmer climate (DeConto and Pollard, 2016; Alley et al., 2023). Glaciers in the ASE accelerate to balance changes in driving stress, however, the strength and roughness of the bed isn't uniform, and thus some areas of Thwaites and Pine Island

in particular have steepened while other areas have become more flat. The heterogeneous pattern of thinning we observe across  
340 Thwaites reveals the complexity of this relationship (Supplement Videos, Hoffman et al., 2020) and agrees with patterns we see in the effective stress field.

This also appears to explain why crevasses jump inland, sometimes skipping several kilometers of uncrevassed area to initiate upstream in regions where the surface stresses are higher. In these areas, surface slopes are steep often on the lee side of local surface elevation highs associated with large-scale ridges in subglacial topography and locally enhanced basal resistance (Fig.  
345 11; Hoffman et al., 2022). In this way, surface crevasses appear to be connected to glacier sliding as the relationship between basal shear stress and glacier sliding velocity mediates inland stress transmission.

## 4.2 Depiction of Crevasses in Ice-Penetrating Radar Data

Joint inspection of co-located SAR-detected crevasses and ice-penetrating radar profiles revealed that crevasses identified in the SAR imagery are also expressed in ice-penetrating radar data. Because ice-penetrating radar data image the depth of englacial  
350 structures, these data can add context to the crevasses we identify in satellite SAR imagery. In the discussion that follows, we begin by describing the manifestation of crevasses in the ice-penetrating radar data. We then consider the implications of the features we image for crevasse geometry and depth.

Most crevasses we observe in the survey are imaged either as voids that start at the surface or bright hyperbolic reflectors in the near-surface ( $< 100$  m depth) with voids beneath the hyperbolas that interrupt layering at depth (Fig. 5c, Supplement Fig.  
355 S3, S4). Occasionally, we observe hyperbolic reflections deeper in the column – sometimes 100 – 150 m below the surface. These depths are below the observed firn-ice transition measured from ASE firn cores (Gow et al., 2004). These features could be crevasses we image off-nadir that appear deeper in radar profiles than they are in reality. They could also reflect larger flaws in the ice ( $>4$ m) that have been shown using linear elastic fracture mechanics to reduce the tensile strength of ice (i.e. 59 kPa Lai et al., 2020). ~~In all cases~~For all profiles, the radar ~~does~~systems do not image hyperbolic reflectors deeper than  $\sim 200$  m  
360 except where basal crevasses on ice shelves are also present. Voids and hyperbolic reflectors often begin below intact near-surface layering. Features we identify as buried crevasses only appear downstream of onset zones in areas where the surface expression of crevasses is muted in SAR and optical imagery (i.e. Figure 4c). Except for several very wide crevasses on the ice shelf, englacial layering in the vicinity of the crevasses does not noticeably slope into the crevasse.

The bright reflectors we observe buried beneath the surface are consistent with hyperbolic scatterers due to apparent diffrac-  
365 tion where snow bridges re-connect with the continuous firn. Beneath these hyperbolic scatterers, very little energy is returned to the receiver. Similarly, where crevasses penetrate to the surface in optical and SAR imagery, ice-penetrating radar data show a significant decrease in energy reflected back to the receiver. This low-energy void appears to be caused by the steep angle of crevasse side walls that facilitate the refraction of energy along the wall away from the radar receiver. This results in a low-energy void beneath the top of the crevasse to depths below the bed reflector in neighboring traces to the noise floor of the  
370 receiver. The voids clearly cannot be interpreted as a proxy for crevasse depth, their appearance does change though with the width of the crevasse feature. Near crevasse onset zones where crevasses occur at the surface, sidewall hyperbolic reflections, if present, are very weak. Further downstream, where crevasses are wider (Supplementary Fig. S7-S8), all features discussed

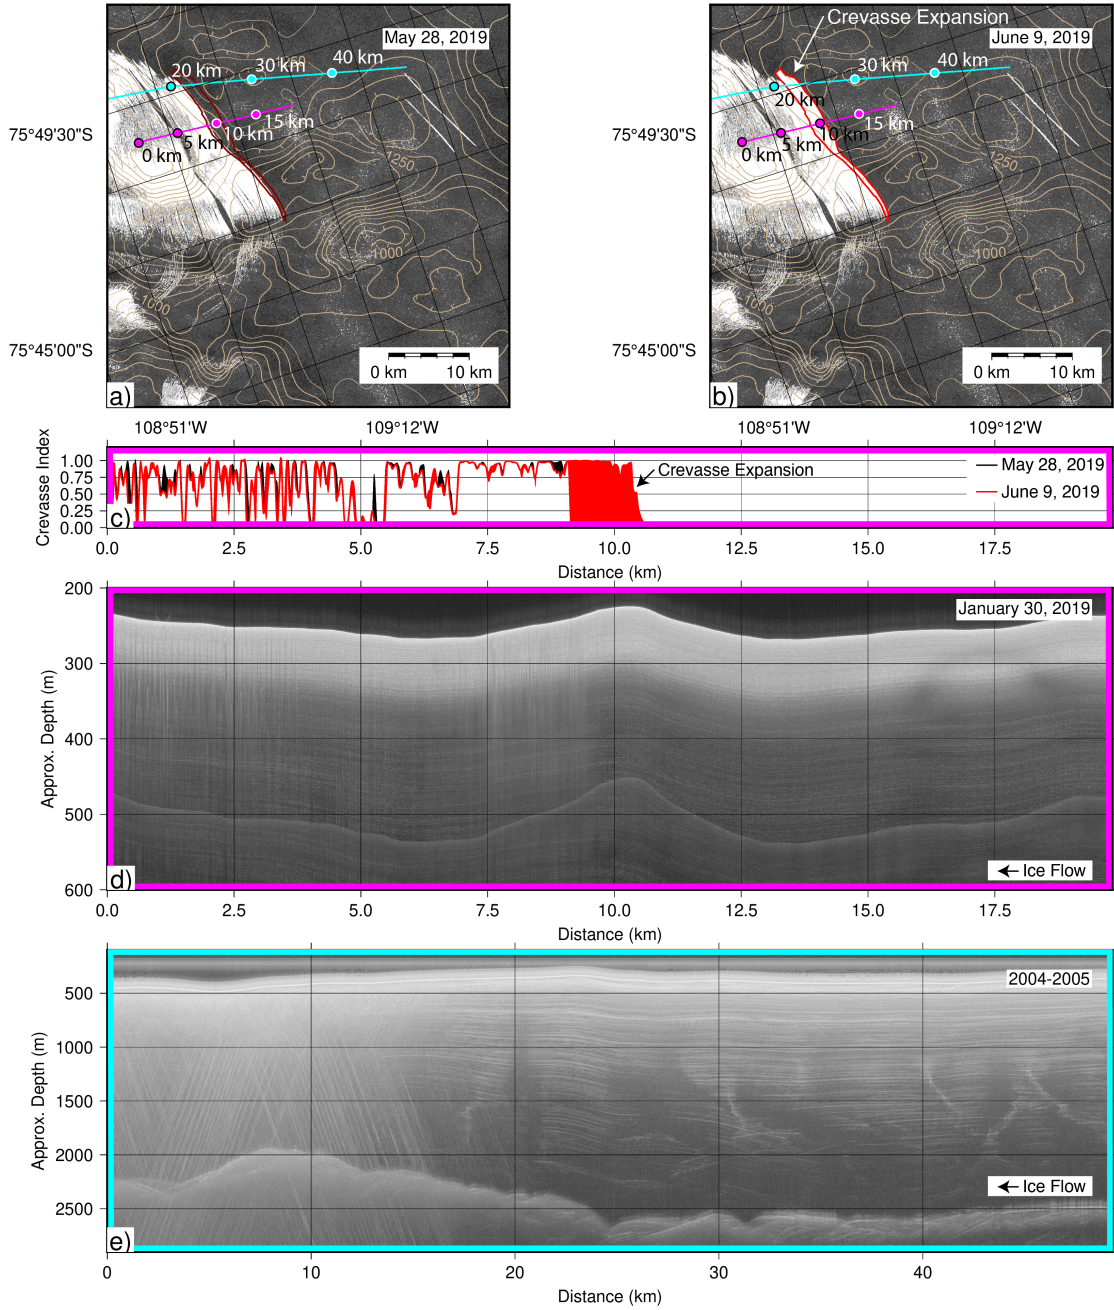

**Figure 11.** Crevasse observed in Sentinel-1A SAR imagery on May 28, 2019 (a) and June 9, 2019 (b), highlighting a major crevasse event. Crevasse probability index from this study and accumulation radar data collected by the International Thwaites Glacier Collaboration airborne geophysics campaign (magenta profile in the top panels) are also plotted (c). Also included (d,e) is a profile of ice-penetrating radar data collected as part of the Aerogeophysical Survey of the Amundsen Sea Embayment, Antarctica (AGASEA) project (cyan profile in the top panels). Contours in the top panels are bed elevation from BedMachine Antarctica.

above are more notable (i.e. Figure 5c compared to Figure 5e). For these larger crevasses, we also observe internal layers dipping towards the crevasse, which we do not see in the vicinity of narrower crevasses we image upstream.

375 Crevasse depths remain extremely difficult to measure directly. With ground-based and airborne radar technology, it remains possible only to observe how the features affect local stratigraphy and flow expressed in nearby layer slopes. Because energy is critically refracted away from the receiver below the exposed surface crevasses (or the initial firn-air reflection of buried crevasses), we never image the base of the crevasses we identify in SAR imagery and ice-penetrating radar data. The lack of diffraction hyperbola from crevasse sidewalls and the width of the void space suggest that the near-surface expression of  
380 the features is small relative to the trace spacing of the radar system; however, narrow crevasses have still been observed to penetrate deep into the near-surface (Lindner et al., 2019). The most compelling evidence that suggests the buried crevasses we image with radar do not penetrate below the firn is the absence of hyperbolic scatters below depths of 200 m and the limited impact the surface features appear to have on nearby ice flow.

In areas of crevasse onset, where englacial stratigraphy below 200 m depth is present on either side of the void space, the  
385 stratigraphy remains continuous and layers do not dip into the low-energy void. This suggests that these crevasses minimally disrupt the flow, which tends to close large crevasses at depths where the overburden stress of the ice and firn exceeds the horizontal tensile stress of the ice column ( $\sim 100$  m depth van der Veen, 1998). We see this effect downstream where the expression of the crevasse void space and sidewall reflectors change with increasing horizontal strain rates. After crevasses open, the confining overburden pressure of firn and ice above drives viscous flow into the void space. This can cause the draw-  
390 down of englacial layers on either side of the crevasse, which we use as a diagnostic tool to constrain the depth of crevasses (Fig. 5 and Supplementary Fig. S8S9). Over the ice shelf, the width of the low power return beneath apparent surface crevasses increases, and sidewall reflections of near-surface crevasses become visible at intermediate depths (Fig. 5). Near these wider crevasses, layers steepen, sloping into the apparent void at intermediate depths ( $\sim 40$  m). This suggests that the features are large enough and extend deep enough that they can affect ice flow well below the surface. Over the ice shelf, we also image the  
395 tips of basal crevasses that extend upward 400 – 500 m from the ice-shelf base (Supplementary figures S8, S9). Englacial layer slopes change above these basal crevasses, suggesting again that these much larger features affect flow in ways the interior surface crevasses do not. These basal crevasse features extend three times deeper into the ice shelf than the deepest hyperbolic defractors associated with surface crevasses and reveal how near full-thickness crevasse features appear in the same radar data.

### 4.3 Firn tensile strength

400 In the top half of the ice column, where viscosity changes are small, we assume that the tensile stresses are nearly uniform. As a result, crevassing in this region can define a strength threshold and suggests that the densifying snow and firn are weaker than the solid ice below.

Below the near-surface, where crevasses have opened, compressive overburden pressure acts to close open-air crevasses (Weertman, 1973; Smith, 1976, 1978; van der Veen, 1998). Our observations are consistent with crevasses closing below 200  
405 m depth and suggest that compressive overburden stresses in combination with firn strengthening with density and depth, arrest dry firn crevasse propagation.

In the literature, inconsistent attention to the strength of firn has led to reported disagreement between the fracture properties of ice derived from laboratory measurements and estimates from in situ and remote-sensing observations. Tensile strengths measured in laboratory experiments are significantly higher than those determined from remote sensing observations. The values we observe (~~75 to 210~~ 82 to 165 kPa) are within ranges reported from other satellite remote-sensing observations of crevassing in Antarctica (Vaughan, 1993) and Greenland (Grinsted et al., 2023). These ranges are consistent with our geometric model which predicts firn fracture where effective stresses exceed ~~75 kPa~~ 82 kPa when the bulk average porosity is greater than 0.4. This suggests that the crevasses and associated tensile strengths determined from remote sensing of surface strain rates likely reflect near-surface fracture in firn, where the fracture toughness and tensile strength are reduced by the porosity of the firn (Smith et al., 1990; Fischer et al., 1995; Rist et al., 1999, 2002).

#### 4.4 Implications of firn crevasses

Our observations of inland ~~crevasse migration~~ crevassed area expansion on Thwaites and Pine Island Glaciers are consistent with a porosity-dependent fracture model that predicts firn fracture preceding crevasse penetration through ice. Our model suggests that surface stresses in the ASE open surface crevasses that penetrate through the porous firn. We estimate that the firn in the ASE has a tensile strength between ~~75 and 210~~ 82 and 165 kPa consistent with a depth-averaged porosity between 0.25 and 0.5 ( $\sim 450 - 750 \text{ kg/m}^3$  firn density). These crevasses would not be expected to penetrate deeper into the ice column where the denser ice has a higher tensile strength (Rist et al., 2002) and where the increased pressure with depth is predicted to close dry air crevasses (van der Veen, 1998). These results have implications for understanding the current impact of fractures on ice dynamics in the ASE and the vulnerability of the ice sheet to fracture-related collapse and ice shelf weakening. They also carry implications for determining the mass balance of crevassed sectors of the ice sheet. We devote the remaining discussion to these two related topics and highlight some directions for future observational work.

##### 4.4.1 MICI instability

~~Ovoid~~ Elliptic failure envelope analysis and porosity-dependent tensile strength modeling suggest that tensile strength estimates for ice that use values calculated from observations of surface fractures underestimate the bulk strength of the ice sheet (i.e. the tensile strength of solid ice is greater than ~~210~~ 82 - 165 kPa).

Models of cliff calving that underpin the MICI hypothesis often treat the ice column as a homogeneous material (Parizek et al., 2019; Clerc et al., 2019), with calving thresholds that are sensitive to the prescribed material strength (i.e. DeConto and Pollard, 2016). Our work shows that the strength of the ice column is likely heterogeneous with depth, and observed surface crevassing would not occur without a porous (and therefore) near-surface firn layer. Remote sensing estimates of tensile strength are more representative of surface properties, and therefore should be treated as a lower limit on material strength, as they would yield unrealistically high rates of full-thickness fracture in MICI models.



#### 4.4.2 Ice-shelf weakening

Surface crevasses have also been suggested to signal ice-shelf weakening (i.e. Lai et al., 2020; Alley et al., 2021; Zhao et al., 2022; Surawy-Stepney et al., 2023a) with several studies recently highlighting the potential impact of ice-shelf surface crevasses on ice flow (Lai et al., 2020; Zhao et al., 2022; Surawy-Stepney et al., 2023a). Our ice-penetrating radar observations of near-surface crevasses inland and across the grounding zone suggest that near-surface crevasses do not significantly change character as they advect onto the ice shelf and that many of these features are still confined to the near surface (Supplementary figures S6, S7). The depth of these features may explain the weak relationship found by Gerli et al. (2023) between ice-shelf crevasses identified by Izeboud and Lhermitte (2023) and inferences of ice-shelf fluidity derived from contemporaneous surface velocity and ice thickness observations. Our results in connection with the findings of Gerli et al. (2023) suggest that surface crevasses expressed in satellite remote sensing datasets (e.g. Lai et al., 2020; Zhao et al., 2022; Surawy-Stepney et al., 2023a; Izeboud and Lhermitte, 2023) only weakly affect the bulk viscosity of ice shelves. In contrast, some of the basal crevasse features we observe with radar penetrate through almost 75% of the ice-shelf column ( $> 600$  m),  $3\times$  the depth of the deepest features associated with buried surface fractures in radar data (supplementary figures S6, S7). These basal crevasse observations should be assimilated into ice shelf models as these features have been observed to affect ice-shelf flow (i.e. Jeong et al., 2016).

#### 4.4.3 Firn air content

Our observations of near-surface crevasse opening in the firn also have implications for satellite remote-sensing observations used to calculate glacier mass loss. Firn depth and density estimates are required to convert altimetry observed height changes to mass changes and remain a major source of uncertainty in mass balance studies (i.e. Morris and Wingham, 2015; Verjans et al., 2021). Firn depth and density estimates are also required to convert firn/ice column thickness and velocity observations to discharge fluxes across the ice-sheet grounding zone (Rignot et al., 2019). Both of these methods rely on accurate descriptions of the firn air content, which can change with horizontal strain rates.

Horizontal stresses can affect firn air content via three different mechanisms. Horizontal divergence can stretch the firn, effectively thinning the firn column as suggested by Horlings et al. (2021). Horizontal stresses can also enhance creep-driven densification (Oraschewski and Grinsted, 2022), and as we've shown in this study, horizontal stresses can fracture the firn, opening large volumes of void space in the near surface.

In grounded ice regions, elevation change observations of the ice-sheet surface can be corrected for changes in firn air content, and glacial isostatic adjustment to estimate grounded ice-sheet mass change. Because this is a measurement of vertical height change, the effect of horizontal void space introduced by crevasses opening in the near-surface affects the estimate of ice-sheet thinning or thickening below based on how the effects of horizontal divergence-induced layer thinning and creep-enhanced densification are parameterized in the treatment of firn air content. A correction that separates enhanced creep-driven firn densification (Oraschewski and Grinsted, 2022) and horizontal divergence induced stretching (Horlings et al., 2021) from horizontal divergence associated with crevasse opening could account for the near-surface changes in firn densification. This



470 effect would tend to decrease the enhanced densification rates calculated by (Horlings et al., 2021) that assume all horizontal divergence in the near-surface is accommodated by vertical densification.

Surface crevasses also affect estimates of ice flux across the grounding zone. Because this measurement is made with respect to a vertical gate at the grounding zone where the ice goes afloat, horizontal and vertical variations in firn air content affect calculations of discharge flux. In regions where the near-surface crevassed area observed with SAR imagery has increased and  
475 presently accounts for  $\sim 10 - 40\%$  of the total surface area, such as lower Thwaites Glacier, the void space associated with open crevasses contributes substantially to the total firn air content. Assuming the depth of the void space is on average  $\sim 20$  m, the area occupied by crevasses may represent between  $2 - 8$  m of unaccounted air content in the near-surface that would affect the discharge calculations of Thwaites Glacier made from horizontal velocity and surface thinning observations. These approach the uncertainty in bed topography measured with ice-penetrating radar crossover discrepancies in ice thickness (mean  
480 8m, RMS 47m; Holt et al., 2006) and can change over time with the stress state of ice near the grounding zone. Together, the firn air content (consistent with the horizontal strain in areas that remain uncrevassed) and the crevasse void space should both be included in flux-gate analysis of glacier systems.

#### 4.4.4 Surface Albedo

The appearance of surface crevasse features in panchromatic and SAR imagery also highlights how crevasses affect ice sheet  
485 albedo. Incipient roughness associated with near surface crevasses has previously been suggested as a driver of surface ablation  
feedbacks, which can cause small-scale roughness features to grow and eventually impact the morphology of the crevasse and  
surface water storage (Pfeffer and Bretherton, 1987; MacClune et al., 2003; Cathles et al., 2011, 2014). The growth of surface  
features in mountain glacier environments like sun cups and penitents (pointed ice or snow columns) has also been connected  
to solar absorption feedbacks initiated by pre-existing surface roughness (Berterton, 2001). Previous studies have used radiative  
490 transfer models to understand how the shape of these features affects their evolution. These studies have shown that crevasses  
of reasonable geometries for latitudes consistent with Greenland outlet glaciers can increase the local absorption of shortwave  
radiation by  $> 50\%$  (Warren, 2022). Fewer studies have explored this feedback for crevasse orientations and latitudes consistent  
with Antarctic outlet glaciers for present and warmer future climates. We leave this as a promising extension of the work  
presented here.

## 495 5 Conclusions

We present new observations of changes in the fracture behavior of the ice-sheet near-surface of Thwaites Glacier and its neighbors in the Amundsen Sea Embayment. Our results indicate that changes in the crevassed area are ~~generally correlated~~  
consistent with increases in surface stresses in response to ongoing ocean-driven acceleration. Although our observations are consistent with observations of ice-sheet near-surface tensile strength ( ~~$\sim 70 - 200$~~   $\sim 82 - 164$  kPa) determined from remote  
500 sensing, these failure limits are lower than the failure limits predicted by laboratory experiments conducted on solid ice. We have shown that these inconsistencies can be resolved by accounting for the effects of firn porosity on near-surface tensile

strength. Using this new model, we showed that the increase in the crevassed area on Thwaites Glacier is consistent with the increase in the area where effective surface stresses exceeding a critical tensile strength for the near-surface firn. ~~At present, the near-surface crevasse features appear~~ We speculate that at present, because of the near surface nature of these features, surface crevassed area change appears to be a symptom rather than a driver ~~of~~ acceleration and retreat in the ASE. The void space introduced by crevasses in the near-surface may not have a large effect on full-thickness failure rates but likely does affect calculations of firn air content and surface albedo in rapidly accelerating and crevassed areas of the ice sheet. ~~The time-series of crevassed-area evolution that we use to support these results presents a valuable target for models that incorporate near-surface fracture or continuum damage mechanics.~~ Finally, the ongoing collection of SAR images can also be processed rapidly enough using ~~our automated framework~~ automated framework (e.g., (Izeboud and Lhermitte, 2023; Surawy-Stepney et al., 2023a, b) and our work) that live crevasse detection in areas where researchers are conducting fieldwork is possible.

*Code and data availability.* The fracture fields for Amundsen Sea glaciers are available at the NSIDC. For live maps of crevasse patterns in new locations, reach out to aoh2111@columbia.edu. The scripts for creating the figures and crevasse propagation rate data products shown in this study are available at the GitHub repository: [https://github.com/hoffmaao/thwaites\\_crevasses](https://github.com/hoffmaao/thwaites_crevasses). The masking software used to build the georeferenced masks is available at <https://github.com/hoffmaao/EarthMasker>.

*Video supplement.* Videos of crevasse migration on Thwaites Glacier are available at <https://doi.org/10.5446/62770>, and <https://doi.org/10.5446/62771>.

*Team list.* The complete member list of the GHOST science team can be found at <https://thwaitesglacier.org/projects/ghost>.

*Author contributions.* AOH and KC theorized the study. AOH wrote the software to segment images and implemented the neural network crevasse detection method following the work of CYL. AOH, KC, and NDH interpreted the radar grams collected by operation ice bridge. IJ processed and created the velocity time series used to calculate surface strain. AOH wrote the first draft of the manuscript. All authors contributed to the editing of the manuscript.

*Competing interests.* The authors declare no conflicts of interest.

*Acknowledgements.* The work was supported by a NASA FINESST award (grant 80NSSC20K1627), the NASA sea-level change team (grant 80NSSC17K0698), and the NSF-NERC International Thwaites Glacier Collaboration (grant OPP-1738934).

## References

- Abadi, M., Agarwal, A., Barham, P., Brevdo, E., Chen, Z., Citro, C., Corrado, G. S., Davis, A., Dean, J., Devin, M., Ghemawat, S., Goodfellow, I., Harp, A., Irving, G., Isard, M., Jozefowicz, R., Jia, Y., Kaiser, L., Kudlur, M., Levenberg, N., Mané, D., Schuster, M., Monga, R., Moore, S., Murray, D., Olah, C., Shlens, J., Steiner, B., Sutskever, I., Talwar, K., Tucker, P., Vanhoucke, V., Vasudevan, V., Viégas, F., Vinyals, O., Warden, P., Wattenberg, M., Wicke, M., Yu, Y., and Zheng, X.: TensorFlow: Large-scale machine learning on heterogeneous systems., <https://www.tensorflow.org/>, 2015.
- Akeret, J., Chang, C., Lucchi, A., and Refregier, A.: Radio frequency interference mitigation using deep convolutional neural networks, *Astronomy and Computing*, 18, 35–39, 2017.
- Alley, K. E., Scambos, T. A., Anderson, R. S., Rajaram, H., Pope, A., and Haran, T. M.: Continent-wide estimates of Antarctic strain rates from Landsat 8-derived velocity grids, *Journal of Glaciology*, 64, 321–332, <https://doi.org/10.1017/jog.2018.23>, 2018.
- Alley, K. E., Wild, C. T., Luckman, A., Scambos, T. A., Truffer, M., Pettit, E. C., Muto, A., Wallin, B., Klinger, M., Sutterley, T., Child, S. F., Hulen, C., Lenaerts, J. T. M., MacLennan, M., Keenan, E., and Dunmire, D.: Two decades of dynamic change and progressive destabilization on the Thwaites Eastern Ice Shelf, *The Cryosphere*, 15, 5187–5203, <https://doi.org/10.5194/tc-15-5187-2021>, 2021.
- Alley, R., Horgan, H., Joughin, I., Cuffey, K., Dupont, T., Parizek, B., Anandakrishnan, S., and Bassis, J.: A simple law for ice-shelf calving, *Science*, 322, 1344, <https://doi.org/10.1126/science.1162543>, 2008.
- Alley, R., Cuffey, K., Bassis, J., Alley, K., Wang, S., Parizek, B., Anandakrishnan, S., Christianson, K., and DeConto, R.: Iceberg Calving: Regimes and Transitions, *Annual Review of Earth and Planetary Sciences*, 51, 189–215, <https://doi.org/10.1146/annurev-earth-032320-110916>, 2023.
- ASF DAAC: Alaska Satellite Facility Distributed Active Archive Center, contains modified Copernicus Sentinel data 2014–2022, 2014–2022.
- Ashby, M. F. and Medalist, R. M.: The mechanical properties of cellular solids, *Metallurgical Transactions A*, 14, 1755–1769, 1983.
- Banwell, A. F., MacAyeal, D. R., and Sergienko, O. V.: Breakup of the Larsen B Ice Shelf triggered by chain reaction drainage of supraglacial lakes, *Geophysical Research Letters*, 40, 5872–5876, <https://doi.org/10.1002/2013GL057694>, 2013.
- Bassis, J. N. and Walker, C. C.: Upper and lower limits on the stability of calving glaciers from the yield strength envelope of ice, *Proceedings of the Royal Society A: Mathematical, Physical and Engineering Sciences*, 468, 913–931, <https://doi.org/10.1098/rspa.2011.0422>, 2012.
- Benn, D. I., Luckman, A., Åström, J. A., Crawford, A. J., Cornford, S. L., Bevan, S. L., Zwinger, T., Gladstone, R., Alley, K., Pettit, E., and Bassis, J.: Rapid fragmentation of Thwaites Eastern Ice Shelf, *The Cryosphere*, 16, 2545–2564, <https://doi.org/10.5194/tc-16-2545-2022>, 2022.
- Berg, B. and Bassis, J.: Crevasse advection increases glacier calving, *Journal of Glaciology*, 68, 977–986, <https://doi.org/10.1017/jog.2022.10>, 2022.
- Betterton, M. D.: Theory of structure formation in snowfields motivated by penitentes, suncups, and dirt cones, *Physical Review E*, 63, 056 129, 2001.
- Bindschadler, R., Vornberger, P., Blankenship, D., Scambos, T., and Jacobel, R.: Surface velocity and mass balance of Ice Streams D and E, West Antarctica, *Journal of Glaciology*, 42, 461–475, <https://doi.org/10.3189/s0022143000003452>, 1996.
- Cathles, L. M., Abbot, D. S., Bassis, J. N., and MacAyeal, D. R.: Modeling surface-roughness/solar-ablation feedback: application to small-scale surface channels and crevasses of the Greenland ice sheet, *Annals of Glaciology*, 52, 99–108, <https://doi.org/10.3189/172756411799096268>, 2011.

- Cathles, L. M., Abbot, D. S., and MacAyeal, D. R.: Intra-surface radiative transfer limits the geographic extent of snow penitents on horizontal snowfields, *Journal of Glaciology*, 60, 147–154, <https://doi.org/10.3189/2014JoG13J124>, 2014.
- 565 Chudley, T. R., Christoffersen, P., Doyle, S. H., Dowling, T. P. F., Law, R., Schoonman, C. M., Bougamont, M., and Hubbard, B.: Controls on Water Storage and Drainage in Crevasses on the Greenland Ice Sheet, *Journal of Geophysical Research: Earth Surface*, 126, e2021JF006287, <https://doi.org/https://doi.org/10.1029/2021JF006287>, e2021JF006287 2021JF006287, 2021.
- Clerc, F., Minchew, B. M., and Behn, M. D.: Marine Ice Cliff Instability Mitigated by Slow Removal of Ice Shelves, *Geophysical Research Letters*, 46, 12 108–12 116, <https://doi.org/https://doi.org/10.1029/2019GL084183>, 2019.
- 570 Colgan, W., Rajaram, H., Abdalati, W., McCutchan, C., Mottram, R., Moussavi, M. S., and Grigsby, S.: Glacier crevasses: Observations, models, and mass balance implications, *Reviews of Geophysics*, 54, 119–161, <https://doi.org/10.1002/2015rg000504>, 2016.
- Cook, A. J. and Vaughan, D. G.: Overview of areal changes of the ice shelves on the Antarctic Peninsula over the past 50 years, *The Cryosphere*, 4, 77–98, <https://doi.org/10.5194/tc-4-77-2010>, 2010.
- Crawford, A. J., Benn, D. I., Todd, J., Åström, J. A., Bassis, J. N., and Zwinger, T.: Marine ice-cliff instability modeling shows mixed-mode  
575 ice-cliff failure and yields calving rate parameterization, *Nature Communications*, 12, 2701, <https://doi.org/10.1038/s41467-021-23070-7>, 2021.
- Davis, P. E. D., Nicholls, K. W., Holland, D. M., Schmidt, B. E., Washam, P., Riverman, K. L., Arthern, R. J., Vaňková, I., Eayrs, C., Smith, J. A., Anker, P. G. D., Mullen, A. D., Dichek, D., Lawrence, J. D., Meister, M. M., Clyne, E., Basinski-Ferris, A., Rignot, E., Queste, B. Y., Boehme, L., Heywood, K. J., Anandakrishnan, S., and Makinson, K.: Suppressed basal melting in the eastern Thwaites Glacier grounding  
580 zone, *Nature*, 614, 479–485, <https://doi.org/10.1038/s41586-022-05586-0>, 2023.
- DeConto, R. M. and Pollard, D.: Contribution of Antarctica to past and future sea-level rise, *Nature*, 531, 591–597, <https://doi.org/10.1038/nature17145>, 2016.
- Fischer, M. P., Alley, R. B., and Engelder, T.: Fracture toughness of ice and firn determined from the modified ring test, *Journal of Glaciology*, 41, 383–394, <https://doi.org/10.3189/s0022143000016257>, 1995.
- 585 Gerli, C., Rosier, S., Gudmundsson, H., and Sun, S.: Weak relationship between remotely detected crevasses and inferred ice rheological parameters on Antarctic ice shelves, *EGU sphere*, 2023, 1–20, <https://doi.org/10.5194/egusphere-2023-2362>, 2023.
- Ghiz, M. L., Scott, R. C., Vogelmann, A. M., Lenaerts, J. T. M., Lazzara, M., and Lubin, D.: Energetics of surface melt in West Antarctica, *The Cryosphere*, 15, 3459–3494, <https://doi.org/10.5194/tc-15-3459-2021>, 2021.
- Gibson, L. J. and Ashby, M. F.: *Cellular Solids, Structure and Property*, Cambridge University Press, Cambridge, United Kingdom, 1999.
- 590 Gow, A. J., Meese, D. A., and Bialas, R. W.: Accumulation variability, density profiles and crystal growth trends in ITASE firn and ice cores from West Antarctica, *Annals of Glaciology*, 39, 101–109, <https://doi.org/10.3189/172756404781814690>, 2004.
- Grinsted, A., Rathmann, N. M., Mottram, R., Solgaard, A. M., Mathiesen, J., and Hvidberg, C. S.: Failure strength of glacier ice inferred from Greenland crevasses, *EGU sphere*, 2023, 1–15, <https://doi.org/10.5194/egusphere-2023-1957>, 2023.
- Haran, T., Klinger, M., Bohlander, J., Fahnestock, M., Painter, T., and Scambos, T.: MEaSUREs MODIS Mosaic of Antarctica 2013–2014  
595 (MOA2014) Image Map, Version 1, <https://doi.org/10.5067/RNF17BP824UM>, 2018.
- Haynes, D. F.: Effect of Temperature on the Strength of Snow-Ice, *Journal of Glaciology*, 22, 321–329, <https://doi.org/10.3189/S0022143000014301>, 1979.
- Hoffman, A. O., Christianson, K., Shapero, D., Smith, B. E., and Joughin, I.: Brief Communication: Heterogenous thinning and subglacial lake activity on Thwaites Glacier, West Antarctica, *The Cryosphere*, 14, 4603–4609, <https://doi.org/10.5194/tc-2020-80>, 2020.

- Hoffman, A. O., Christianson, K., Holschuh, N., Case, E., Kingslake, J., and Arthern, R.: The Impact of Basal Roughness on Inland Thwaites Glacier Sliding, *Geophysical Research Letters*, 49, e2021GL096564, <https://doi.org/10.1029/2021gl096564>, 2022.
- Holt, J. W., Blankenship, D. D., Morse, D. L., Young, D. A., Peters, M. E., Kempf, S. D., Richter, T. G., Vaughan, D. G., and Corr, H. F. J.: New boundary conditions for the West Antarctic Ice Sheet: Subglacial topography of the Thwaites and Smith glacier catchments, *Geophysical Research Letters*, 33, <https://doi.org/https://doi.org/10.1029/2005GL025561>, 2006.
- Horlings, A. N., Christianson, K., Holschuh, N., Stevens, C. M., and Waddington, E. D.: Effect of horizontal divergence on estimates of firn-air content, *Journal of Glaciology*, 67, 287–296, <https://doi.org/10.1017/jog.2020.105>, 2021.
- Izeboud, M. and Lhermitte, S.: Damage detection on antarctic ice shelves using the normalised radon transform, *Remote Sensing of Environment*, 284, 113359, <https://doi.org/https://doi.org/10.1016/j.rse.2022.113359>, 2023.
- Jacobs, S. S., Hellmer, H. H., and Jenkins, A.: Antarctic Ice Sheet melting in the southeast Pacific, *Geophysical Research Letters*, 23, 957–960, <https://doi.org/10.1029/96gl00723>, 1996.
- Jelitto, H. and Schneider, G.: A geometric model for the fracture toughness of porous materials, *Acta Materialia*, 151, 443–453, <https://doi.org/10.1016/j.actamat.2018.03.018>, 2018.
- Jenkins, A., Dutrieux, P., Jacobs, S. S., McPhail, S. D., Perrett, J. R., Webb, A. T., and White, D.: Observations beneath Pine Island Glacier in West Antarctica and implications for its retreat, *Nature Geoscience*, 3, 468–472, <https://doi.org/10.1038/ngeo890>, 2010.
- Jenkins, A., Shoosmith, D., Dutrieux, P., Jacobs, S., Kim, T. W., Lee, S. H., Ha, H. K., and Stammerjohn, S.: West Antarctic Ice Sheet retreat in the Amundsen Sea driven by decadal oceanic variability, *Nature Geoscience*, 11, 733–738, <https://doi.org/10.1038/s41561-018-0207-4>, 2018.
- Jeong, S., Howat, I. M., and Bassis, J. N.: Accelerated ice shelf rifting and retreat at Pine Island Glacier, West Antarctica, *Geophysical Research Letters*, 43, 11,720–11,725, <https://doi.org/https://doi.org/10.1002/2016GL071360>, 2016.
- Joughin, I., Smith, B. E., Howat, I. M., Moon, T., and Scambos, T. A.: A SAR record of early 21st century change in Greenland, *Journal of Glaciology*, 62, 62–71, <https://doi.org/10.1017/jog.2016.10>, 2016.
- Joughin, I., Shapero, D., Smith, B., Dutrieux, P., and Barham, M.: Ice-shelf retreat drives recent Pine Island Glacier speedup, *Science Advances*, 7, eabg3080, <https://doi.org/10.1126/sciadv.abg3080>, 2021.
- Karidi, K.: Improvements to the CReSIS HF-VHF Sounder and UHF Accumulation Radar, Master’s thesis, Electrical Engineering and Computer Science, University of Kansas, 2018.
- Lai, C.-Y., Kingslake, J., Wearing, M. G., Chen, P.-H. C., Gentine, P., Li, H., Spergel, J. J., and van Wessem, J. M.: Vulnerability of Antarctica’s ice shelves to meltwater-driven fracture, *Nature*, 584, 574–578, <https://doi.org/10.1038/s41586-020-2627-8>, 2020.
- Lindner, F., Laske, G., Walter, F., and Doran, A. K.: Crevasse-induced Rayleigh-wave azimuthal anisotropy on Glacier de la Plaine Morte, Switzerland, *Annals of Glaciology*, 60, 96–111, <https://doi.org/10.1017/aog.2018.25>, 2019.
- Lomonaco, R., Albert, M., and Baker, I.: Microstructural evolution of fine-grained layers through the firn column at Summit, Greenland, *Journal of Glaciology*, 57, 755–762, 2011.
- MacClune, K. L., Fountain, A. G., Kargel, J. S., and MacAyeal, D. R.: Glaciers of the McMurdo dry valleys: Terrestrial analog for Martian polar sublimation, *Journal of Geophysical Research: Planets*, 108, <https://doi.org/https://doi.org/10.1029/2002JE001878>, 2003.
- Maiti, S. K., Ashby, M. F., and Gibson, L. J.: Fracture toughness of brittle cellular solids, *Scripta Metallurgy*, 18, 213–217, 1984.
- Marsh, O., Price, D., Courville, Z., and Floricioiu, D.: Crevasse and rift detection in Antarctica from TerraSAR-X satellite imagery, *Cold Regions Science and Technology*, 187, 103284, <https://doi.org/10.1016/j.coldregions.2021.103284>, 2021.
- McClung, D. M.: In-Situ Estimates of the Tensile Strength of Snow Utilizing Large Sample Sizes, CRREL Report 78-27, 1978.

- Meier, M., Lundstrom, S., Stone, D., Kamb, B., Engelhardt, H., Humphrey, N., Dunlap, W. W., Fahnestock, M., Krimmel, R. M., and Walters, R.: Mechanical and hydrologic basis for the rapid motion of a large tidewater glacier: 1. Observations, *Journal of Geophysical Research: Solid Earth*, 99, 15 219–15 229, <https://doi.org/10.1029/94jb00237>, 1994.
- 640 Morris, E. M. and Wingham, D. J.: Uncertainty in mass-balance trends derived from altimetry: a case study along the EGIG line, central Greenland, *Journal of Glaciology*, 61, 345–356, <https://doi.org/10.3189/2015JoG14J123>, 2015.
- Nath, P. C. and Vaughan, D. G.: Subsurface crevasse formation in glaciers and ice sheets, *Journal of Geophysical Research: Solid Earth*, 108, ECV 7–1–ECV 7–12, <https://doi.org/10.1029/2001JB000453>, 2003.
- 645 Needell, C. and Holschuh, N.: Evaluating the Retreat, Arrest, and Regrowth of Crane Glacier Against Marine Ice Cliff Process Models, *Geophysical Research Letters*, 50, e2022GL102 400, <https://doi.org/https://doi.org/10.1029/2022GL102400>, e2022GL102400 2022GL102400, 2023.
- Nye, J. F.: A Method of Determining the Strain-Rate Tensor at the Surface of a Glacier, *Journal of Glaciology*, 3, 409–419, <https://doi.org/10.3189/s0022143000017093>, 1959.
- 650 Nye, J. F. and Perutz, M. F.: The distribution of stress and velocity in glaciers and ice-sheets, *Proceedings of the Royal Society of London. Series A. Mathematical and Physical Sciences*, 239, 113–133, <https://doi.org/10.1098/rspa.1957.0026>, 1957.
- Oraschewski, F. M. and Grinsted, A.: Modeling enhanced firn densification due to strain softening, *The Cryosphere*, 16, 2683–2700, <https://doi.org/10.5194/tc-16-2683-2022>, 2022.
- Parizek, B. R., Christianson, K., Alley, R. B., Voytenko, D., Vaňková, I., Dixon, T. H., Walker, R. T., and Holland, D. M.: Ice-cliff failure via  
655 retrogressive slumping, *Geology*, 47, 449–452, <https://doi.org/10.1130/G45880.1>, 2019.
- Pfeffer, W. T. and Bretherton, C. S.: The effect of crevasses on the solar heating of a glacier surface, *IAHS Publ*, 170, 191–205, 1987.
- Rignot, E., Echelmeyer, K., and Krabill, W.: Penetration depth of interferometric synthetic-aperture radar signals in snow and ice, *Geophysical Research Letters*, 28, 3501–3504, <https://doi.org/10.1029/2000gl012484>, 2001.
- Rignot, E., Mouginot, J., Scheuchl, B., Broeke, M. v. d., Wessem, M. J. v., and Morlighem, M.: Four decades of Antarctic Ice Sheet mass  
660 balance from 1979–2017, *Proceedings of the National Academy of Sciences*, 116, 1095–1103, <https://doi.org/10.1073/pnas.1812883116>, 2019.
- Rist, M. A., Sammonds, P. R., Murrell, S. A. F., Meredith, P. G., Doake, C. S. M., Oerter, H., and Matsuki, K.: Experimental and theoretical fracture mechanics applied to Antarctic ice fracture and surface crevassing, *Journal of Geophysical Research: Solid Earth*, 104, 2973–2987, <https://doi.org/10.1029/1998jb900026>, 1999.
- 665 Rist, M. A., Sammonds, P. R., Oerter, H., and Doake, C. S. M.: Fracture of Antarctic shelf ice, *Journal of Geophysical Research: Solid Earth*, 107, ECV 2–1–ECV 2–13, <https://doi.org/10.1029/2000jb000058>, 2002.
- Ronneberger, O., Fischer, P., and Brox, T.: Medical Image Computing and Computer-Assisted Intervention – MICCAI 2015, 18th International Conference, Munich, Germany, October 5-9, 2015, *Proceedings, Part III, Lecture Notes in Computer Science*, pp. 234–241, [https://doi.org/10.1007/978-3-319-24574-4\\_28](https://doi.org/10.1007/978-3-319-24574-4_28), 2015.
- 670 Schlemm, T., Feldmann, J., Winkelmann, R., and Levermann, A.: Stabilizing effect of mélange buttressing on the marine ice-cliff instability of the West Antarctic Ice Sheet, *The Cryosphere*, 16, 1979–1996, <https://doi.org/10.5194/tc-16-1979-2022>, 2022.
- Schulson, E. M., Baker, I., Robertson, C. D., Bolon, R. B., and Harnimon, R. J.: Fractography of ice, *Journal of Materials Science Letters*, 8, 1193–1194, <https://doi.org/10.1007/BF01730067>, 1989.

- Shepherd, A., Gilbert, L., Muir, A. S., Konrad, H., McMillan, M., Slater, T., Briggs, K. H., Sundal, A. V., Hogg, A. E., and Engdahl, M. E.: Trends in Antarctic Ice Sheet Elevation and Mass, *Geophysical Research Letters*, 46, 8174–8183, <https://doi.org/10.1029/2019gl082182>, 2019.
- Smith, R.: The application of fracture mechanics to the problem of crevasse penetration, *Journal of Glaciology*, 17, 223–228, 1976.
- Smith, R.: Iceberg cleaving and fracture mechanics-a preliminary survey, in: *Iceberg Utilization*, pp. 176–190, Elsevier, 1978.
- Smith, T. R., Schulson, M. E., and Schulson, E. M.: The fracture toughness of porous ice with and without particles, in: *Proceedings of the Ninth International Conference on Offshore Mechanics and Arctic Engineering*, vol. 4 of *Antarctic Research Series*, pp. 241–247, American Society of Mechanical Engineers, 1990.
- SNAP: SNAP - ESA Sentinel Application Platform, SITBX, <https://step.esa.int/>, 2022.
- Surawy-Stepney, T., Hogg, A. E., Cornford, S. L., and Davison, B. J.: Episodic dynamic change linked to damage on the Thwaites Glacier Ice Tongue, *Nature Geoscience*, 16, 37–43, <https://doi.org/10.1038/s41561-022-01097-9>, 2023a.
- Surawy-Stepney, T., Hogg, A. E., Cornford, S. L., and Hogg, D. C.: Mapping Antarctic Crevasses and their Evolution with Deep Learning Applied to Satellite Radar Imagery, *The Cryosphere Discussions*, 2023, 1–32, <https://doi.org/10.5194/tc-2023-42>, 2023b.
- Ultee, L. and Bassis, J.: The future is Nye: an extension of the perfect plastic approximation to tidewater glaciers, *Journal of Glaciology*, 62, 1143–1152, <https://doi.org/10.1017/jog.2016.108>, 2016.
- van der Veen, C.: Fracture mechanics approach to penetration of surface crevasses on glaciers, *Cold Regions Science and Technology*, 27, 31–47, [https://doi.org/https://doi.org/10.1016/S0165-232X\(97\)00022-0](https://doi.org/https://doi.org/10.1016/S0165-232X(97)00022-0), 1998.
- Vaughan, D. G.: Relating the occurrence of crevasses to surface strain rates, *Journal of Glaciology*, 39, 255–266, <https://doi.org/10.3189/s0022143000015926>, 1993.
- Veen, C. J. v. d.: Crevasses on glaciers, *Polar Geography*, 23, 213–245, <https://doi.org/10.1080/10889379909377677>, 1999.
- Verjans, V., Leeson, A. A., McMillan, M., Stevens, C. M., van Wessem, J. M., van de Berg, W. J., van den Broeke, M. R., Kittel, C., Amory, C., Fettweis, X., Hansen, N., Boberg, F., and Mottram, R.: Uncertainty in East Antarctic Firm Thickness Constrained Using a Model Ensemble Approach, *Geophysical Research Letters*, 48, e2020GL092060, <https://doi.org/https://doi.org/10.1029/2020GL092060>, e2020GL092060 2020GL092060, 2021.
- Warren, S. G.: Snow spikes (penitentes) in the dry Andes, but not on Europa: a defense of Lliboutry’s classic paper, *Annals of Glaciology*, 63, 62–66, <https://doi.org/10.1017/aog.2023.12>, 2022.
- Weertman, J.: Can a water-filled crevasse reach the bottom surface of a glacier?, in: *Symposium on the Hydrology of Glaciers*, pp. 139–145, Union Géodésique et Géophysique Internationale. Association Internationale d’Hydrologie Scientifique. Commission de Neiges et Glaces., Cambridge, UK, 1973.
- Williams, R. M., Ray, L. E., Lever, J. H., and Burzynski, A. M.: Crevasse Detection in Ice Sheets Using Ground Penetrating Radar and Machine Learning, *IEEE Journal of Selected Topics in Applied Earth Observations and Remote Sensing*, 7, 4836–4848, <https://doi.org/10.1109/JSTARS.2014.2332872>, 2014.
- Zhao, J., Liang, S., Li, X., Duan, Y., and Liang, L.: Detection of Surface Crevasses over Antarctic Ice Shelves Using SAR Imagery and Deep Learning Method, *Remote Sensing*, 14, <https://doi.org/10.3390/rs14030487>, 2022.
